# Supplementary material for: Evidence for Non-Cancer-Specific T Cell Exhaustion in the Tcl1 Mouse Model for Chronic Lymphocytic Leukemia
Source: MDPI journal article supplement (doi:10.3390/ijms22136648), 2021-06-22

## Supplemental figure legends

**Fig S1. T cell populations, survival and tumor development of CLL-transplanted OT1/OT2, OT1 Rag/OT2 Rag and WT mice.** (A) Flow cytometry data of peripheral blood samples showing CD4/8 and Vb5<sup>pos/neg</sup> T cell distribution in non-transplanted OT1/OT2, OT1 Rag/OT2 Rag and WT mice. (B) Survival curves of CLL-transplanted OT1/OT2, OT1 Rag/OT2 Rag and WT mice and tumor development in OT1/OT2, OT1 Rag/OT2 Rag and WT mice depicted as percentage of lymphocytes.

**Fig S2. Depletion of T cells via pan B/CLL cell MACS isolation.** T cell (CD5<sup>pos</sup>), B cell (CD19<sup>pos</sup>) and CLL cell (CD5<sup>pos</sup> CD19<sup>pos</sup>) abundance in spleen samples of CLL-transplanted (Tx) and non-transplanted (no Tx) WT mice before and post MACS.

**Fig S3. Endogenous T cell expansion in peripheral blood and spleen after CLL transplantation.** (A) Percentage of non-CLL specific (Vb5<sup>pos</sup>) T cells in serial peripheral blood samples before and after tumor transfer in OT1/OT2, OT1 Rag/OT2 Rag and WT mice. (B) Endogenous T cell fractions (Vb5<sup>neg</sup>) in spleen samples of non-transplanted vs. CLL-transplanted (Tx) OT1/OT2, OT1 Rag/OT2 Rag and WT mice.

**Fig S4. BCR analysis of CLL transplanted mice.** BCR clonality of CLL tumors 703, C755, and 658 used for transplantation experiments and of tumor-receiving WT, OT1/OT2, OT1 Rag/OT2 Rag mice. Color code corresponds to different BCR CDR3 sequences depicted in legends. BCR clones < 1% were bioinformatically excluded.

**Fig S5: PD1 expression based on flow cytometry, FACS and RNA-Seq analysis.** (A) Flow cytometry analysis of PD1 levels of transplanted WT, OT1 and OT2 mice. PD1<sup>pos</sup> fractions of WT CD4/CD8 (all Vb5<sup>pos</sup>), OT1 CD8 (Vb5<sup>pos</sup>) and OT2 CD4 (Vb5<sup>pos</sup>) T cells is depicted, respectively. Left panels represent PD1 isotype control, right panels show actual PD1 measurements. (B) Gating strategy for cell sorting of Vb5<sup>pos/neg</sup> PD1<sup>pos/neg</sup> populations is shown. (C) Normalized PD1 expression levels from RNA sequencing of sorted WT CD8/CD4 PD1<sup>pos/neg</sup> (n=3), OT1 CD8 PD1<sup>pos/neg</sup> (n=2 for Vb5<sup>neg</sup> populations, n=3 for Vb5<sup>pos</sup> populations) and OT2 CD4 PD1<sup>pos/neg</sup> (n=3) cell populations are shown. CPM: counts per million, FDR: false-positive detection rate

FIG S1

A

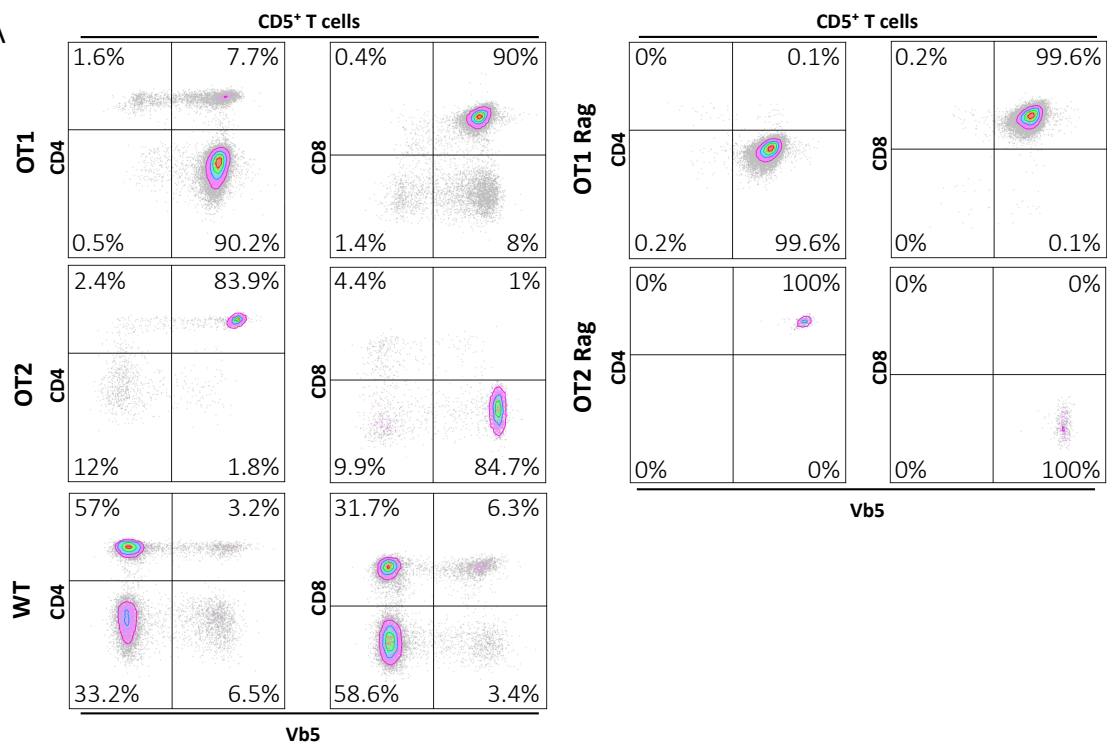

B

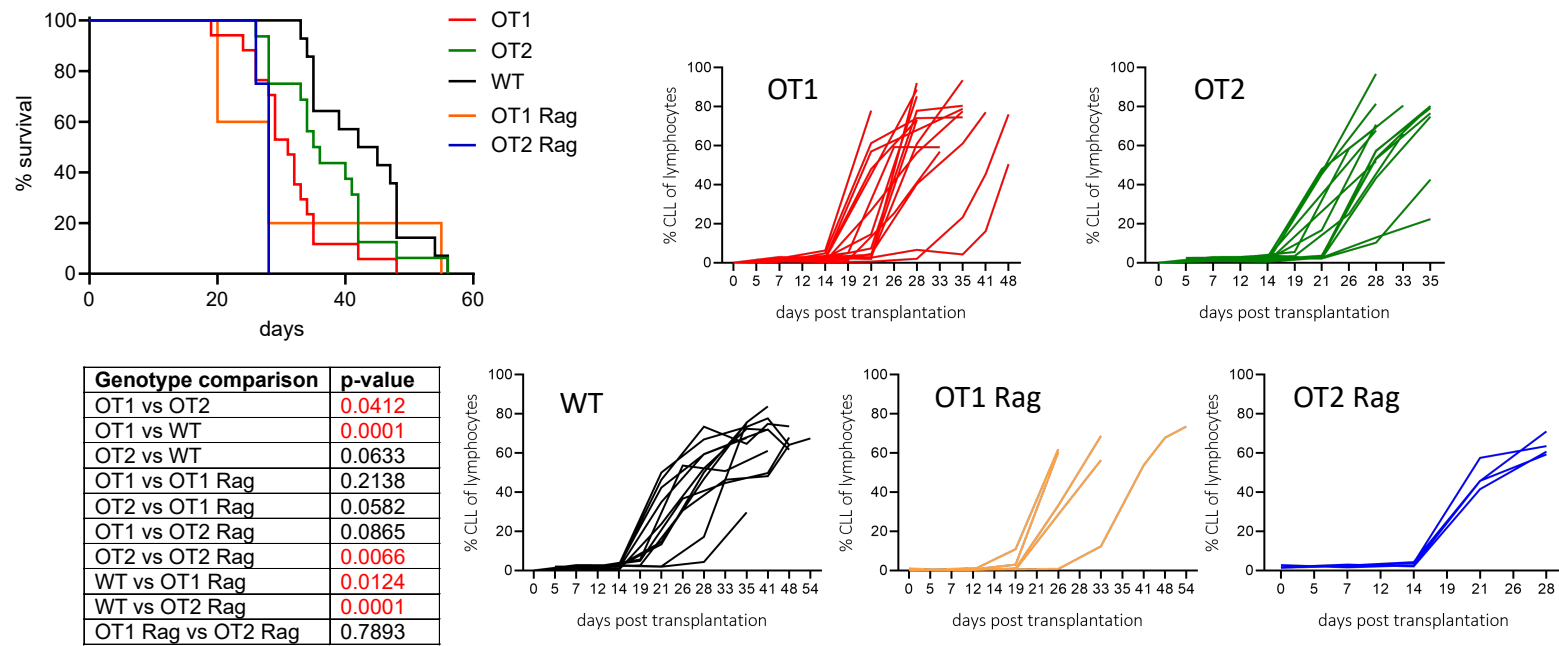

FIG S2

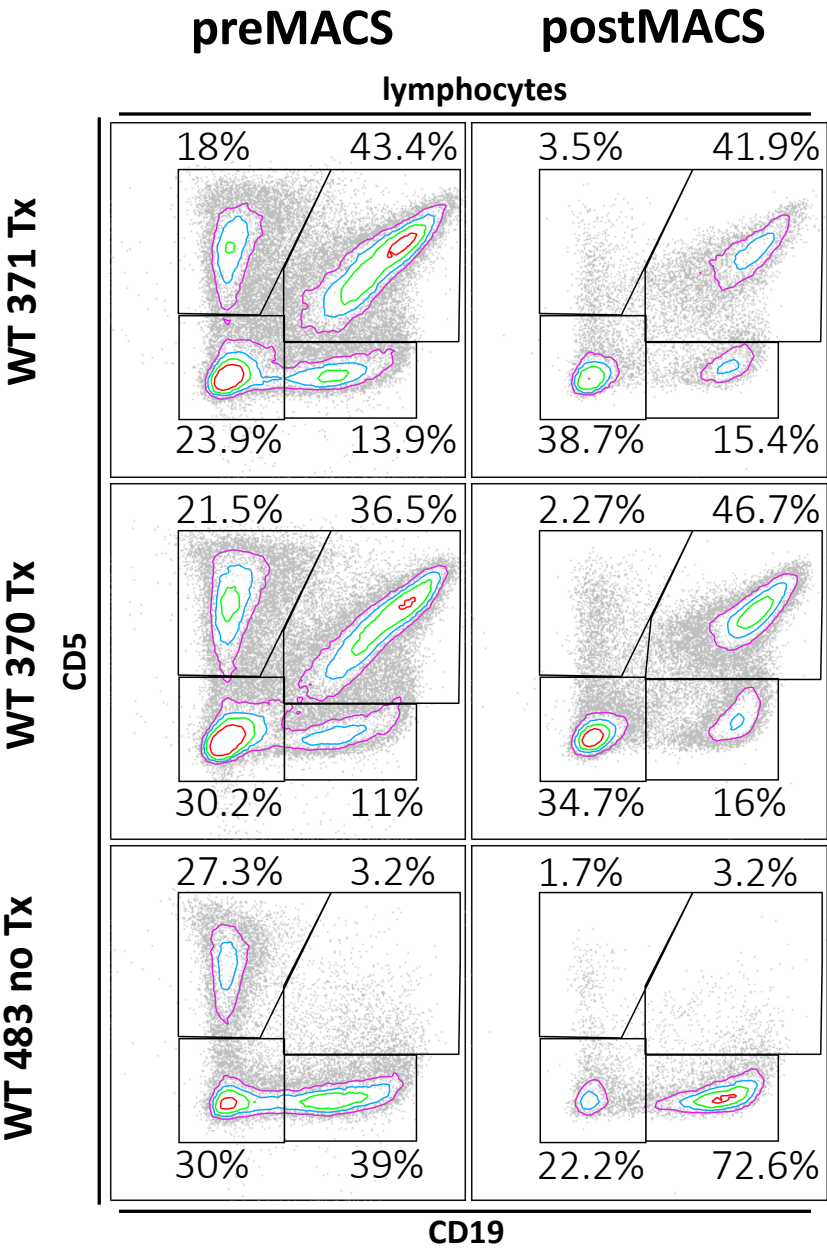

FIG S3

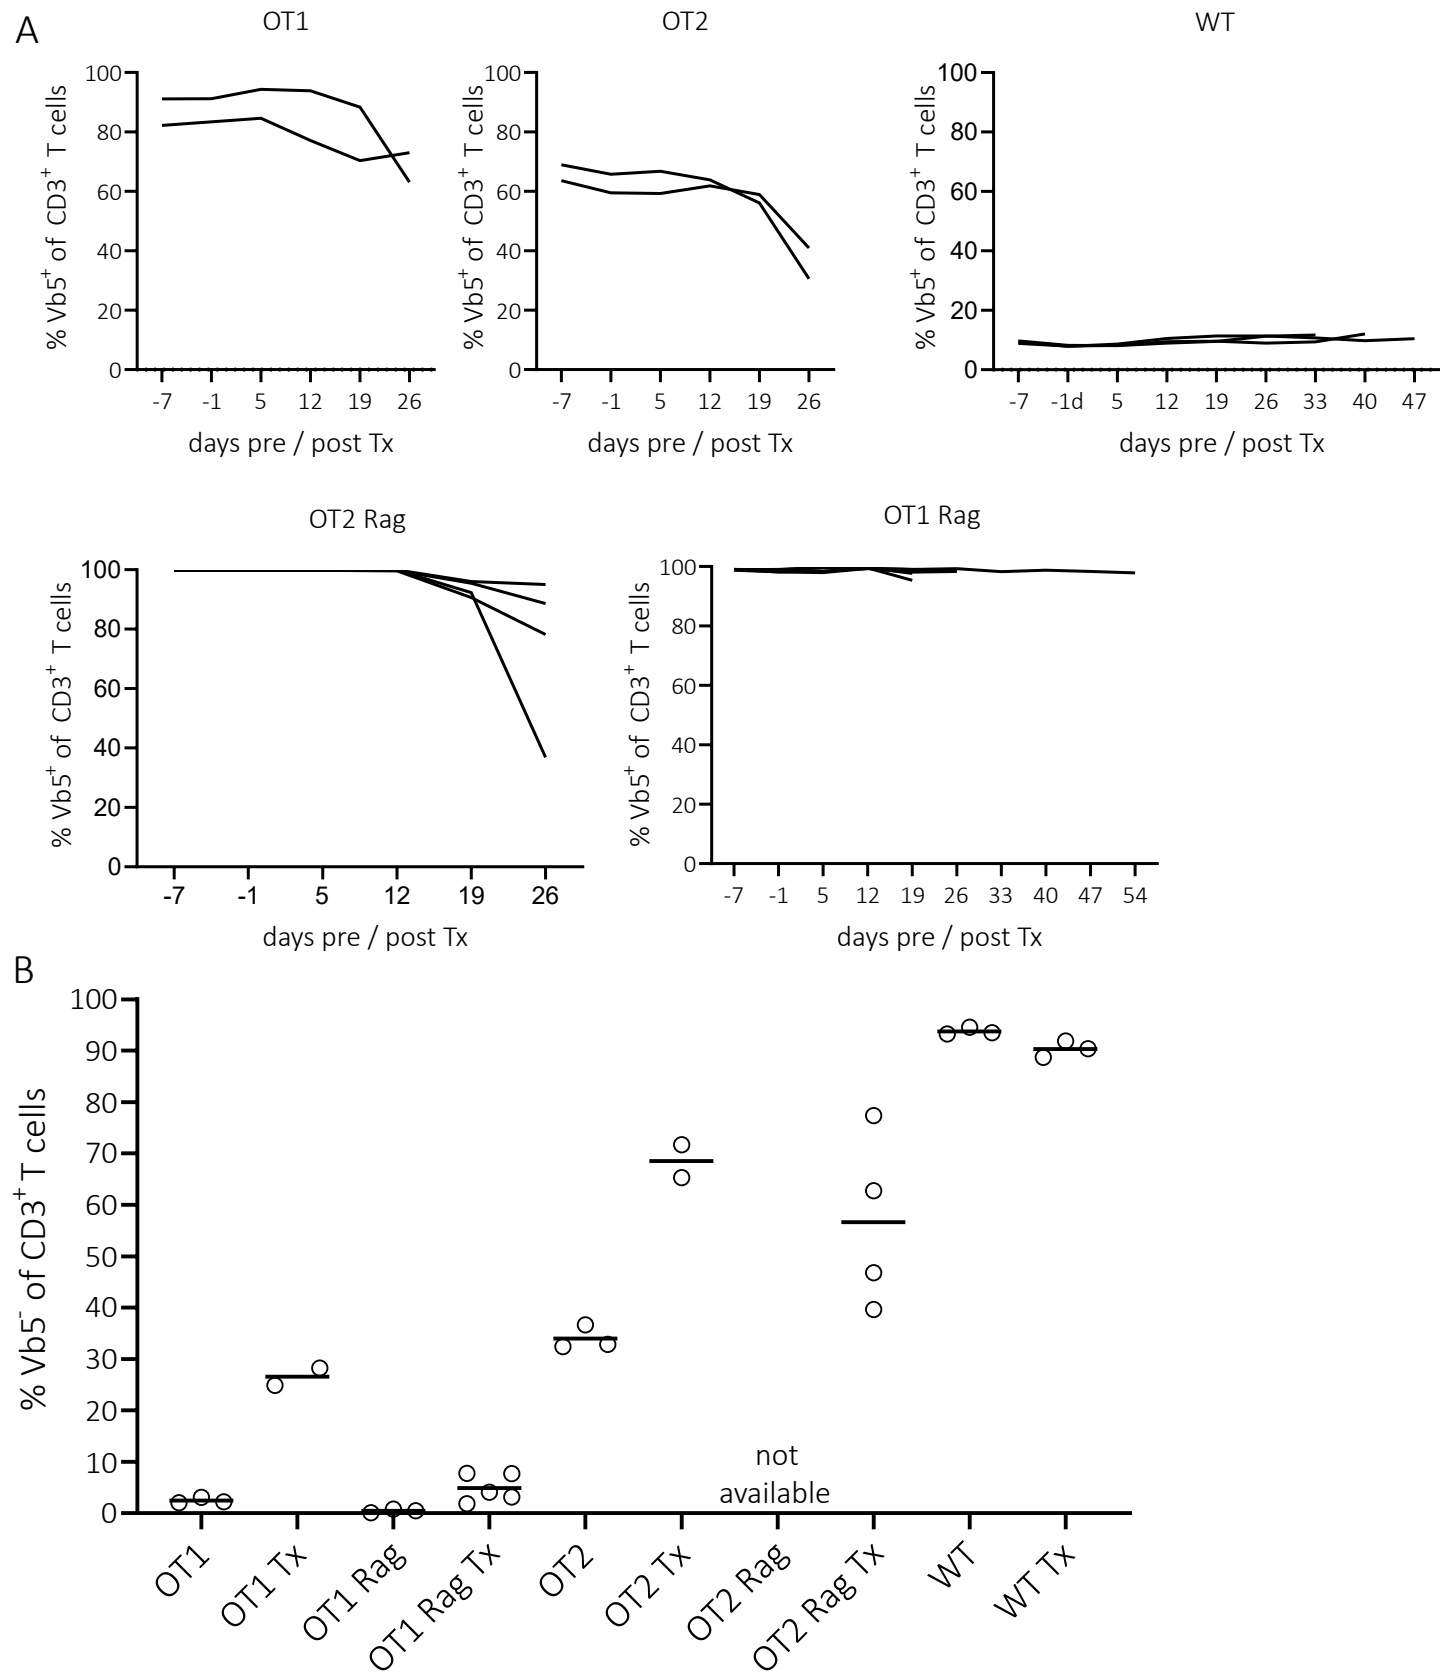



FIG S4

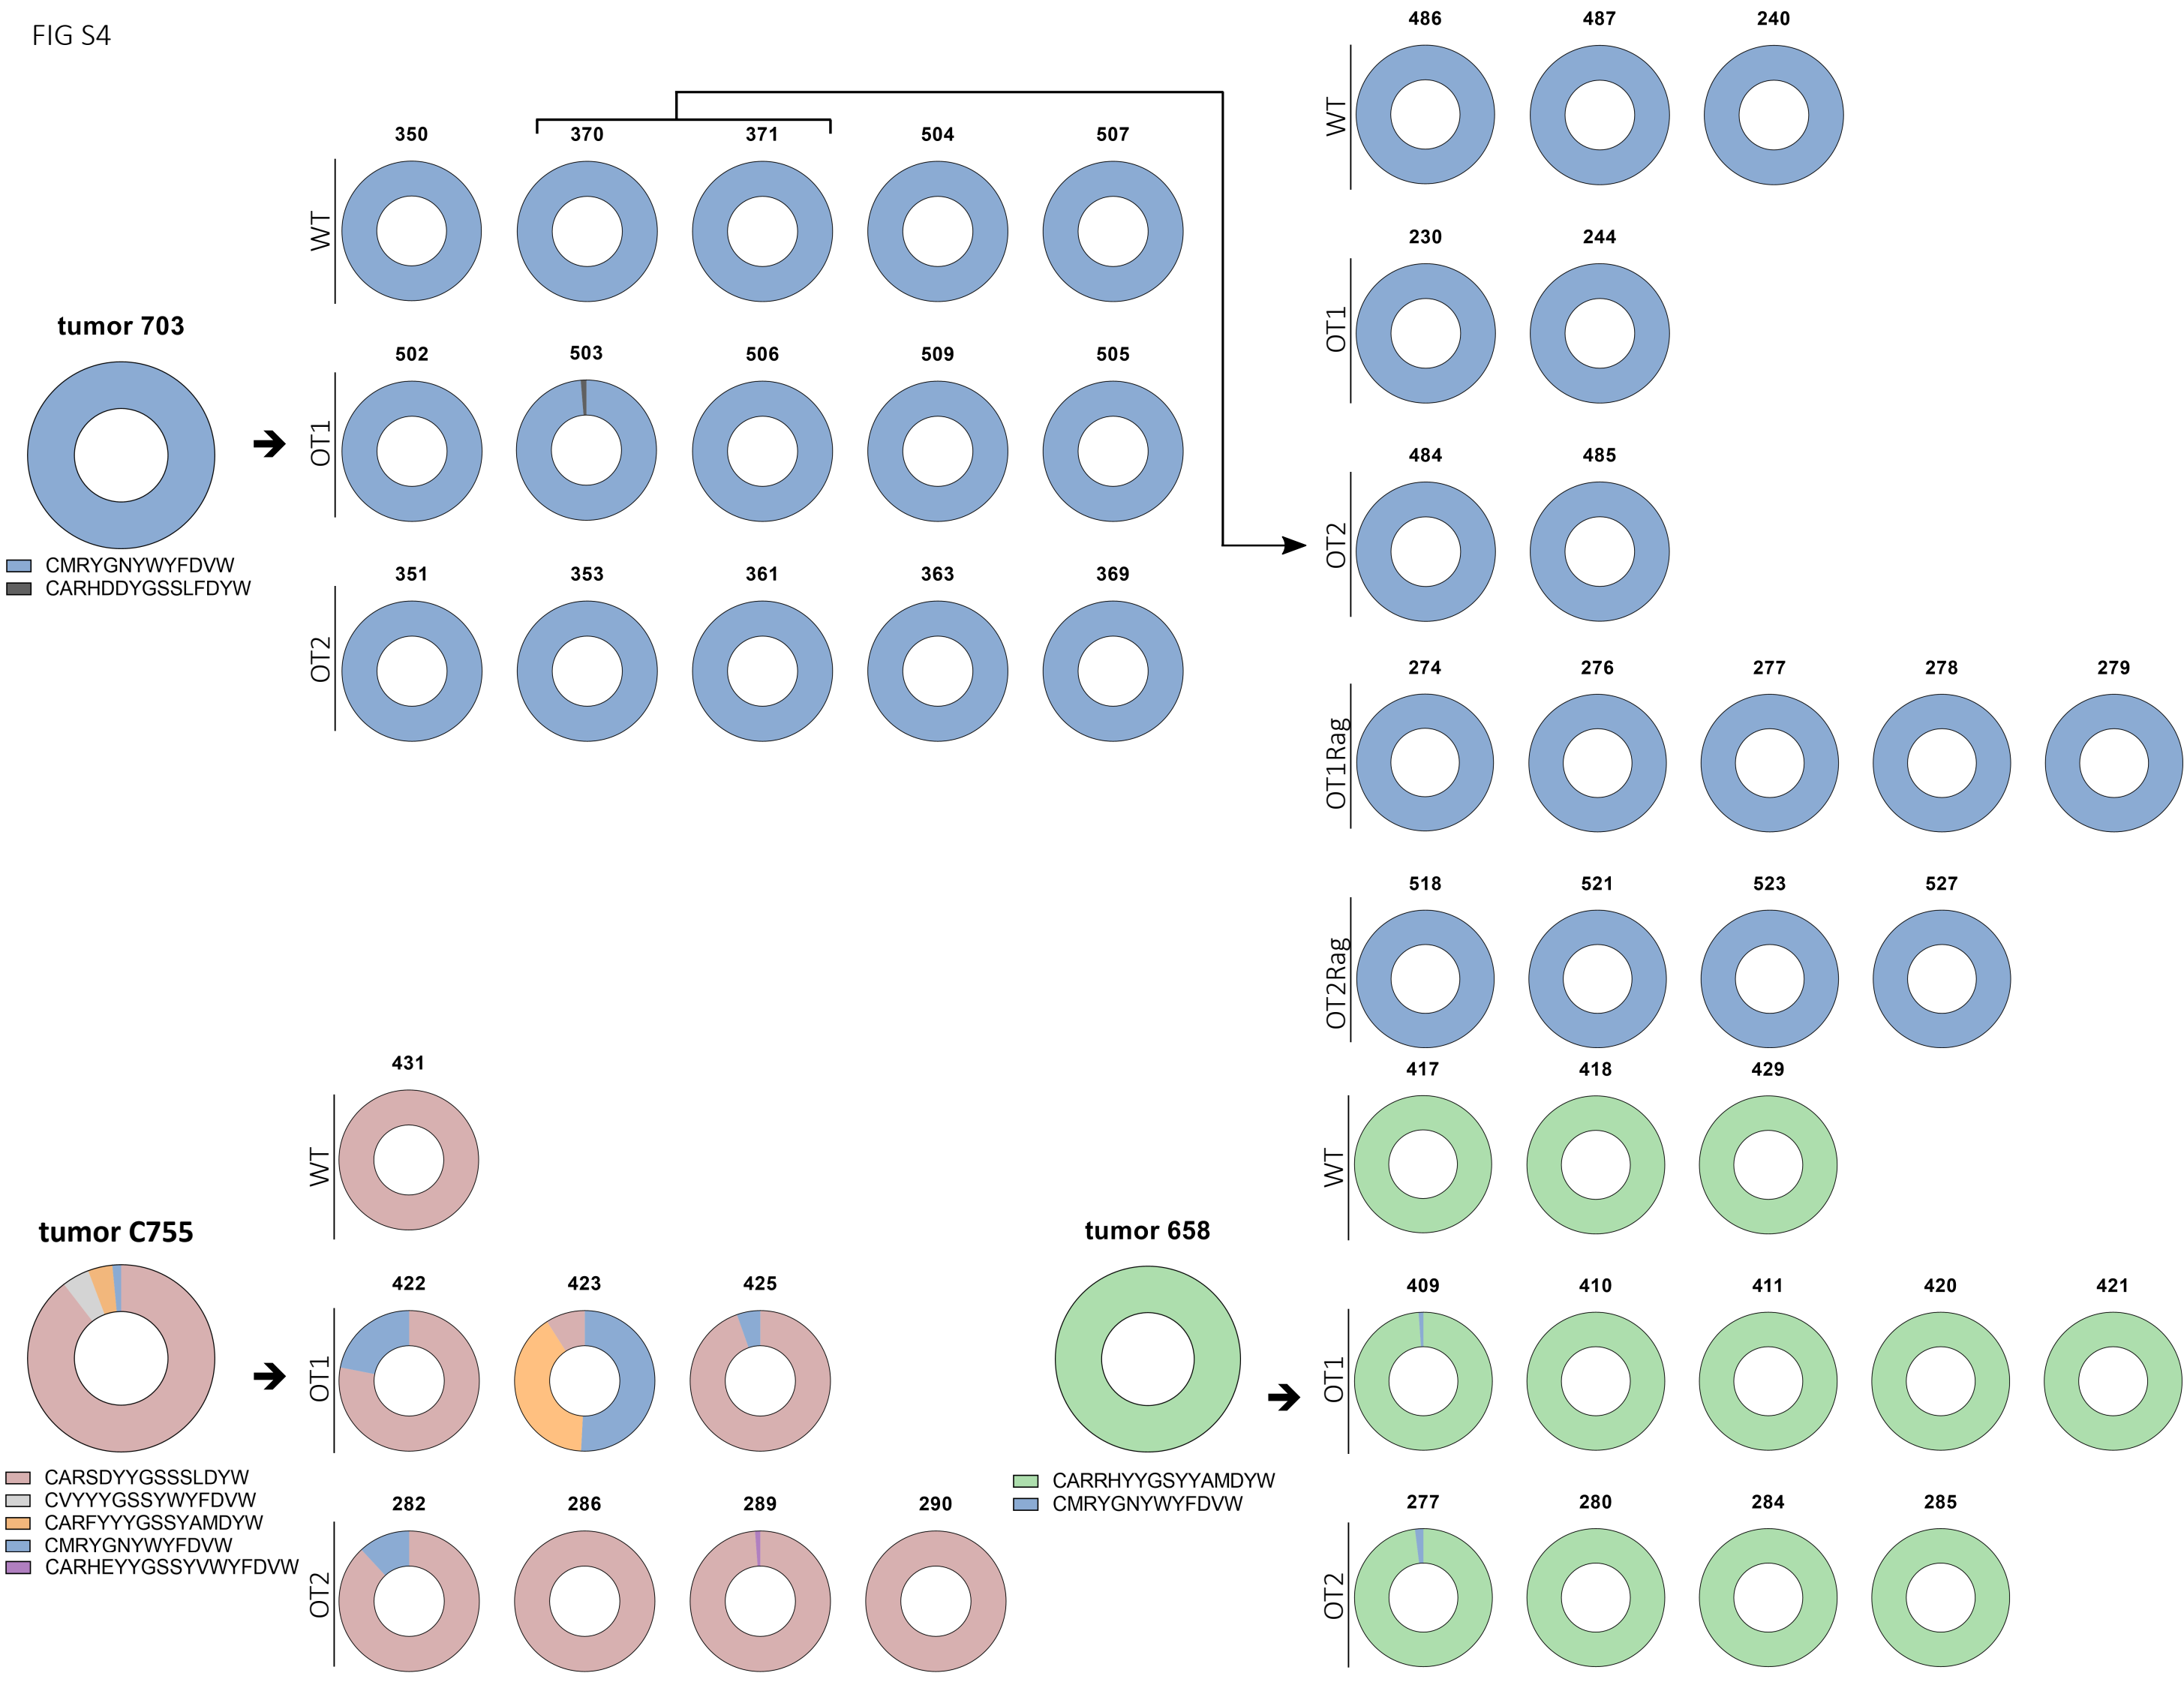

FIG S5

A

# Flow cytometry

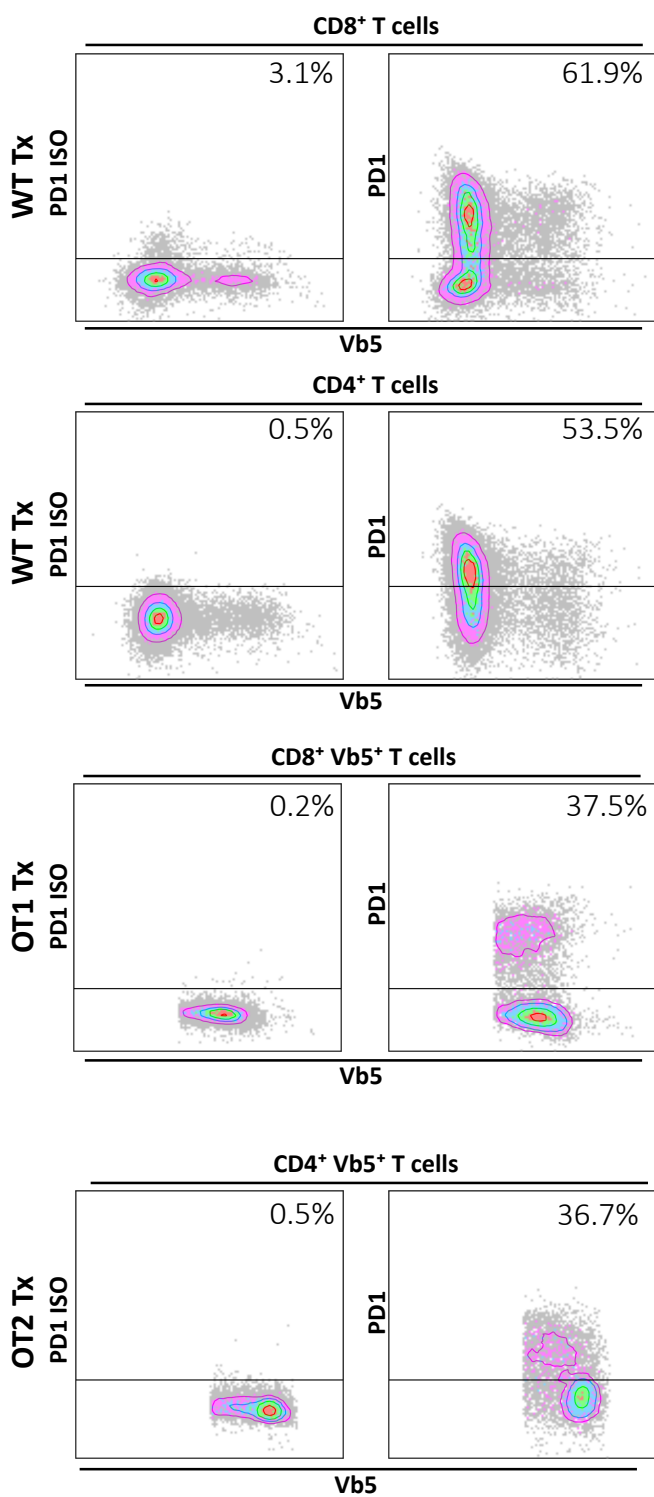

B

# FACS

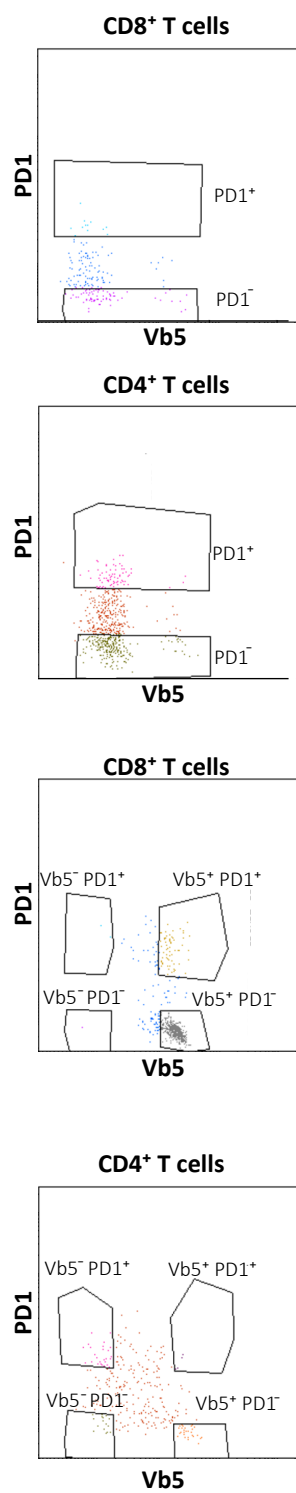

C

# RNA-Seq

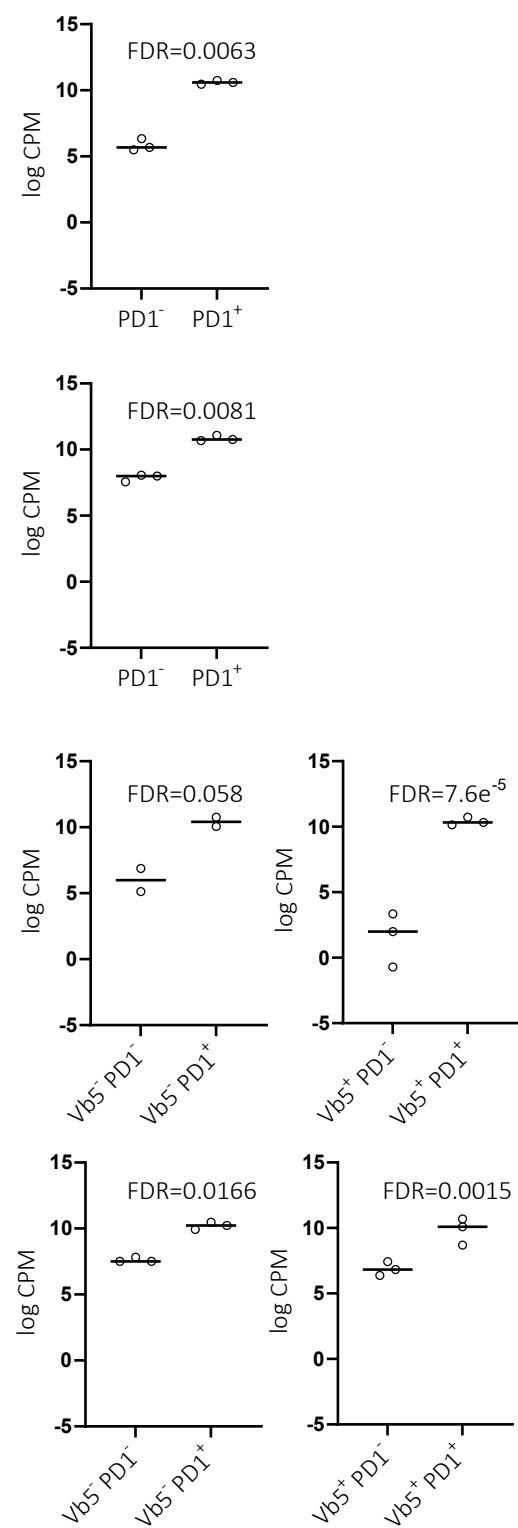

Supplement: s1 [file s1]
