# Supplementary material for: Evidence for Non-Cancer-Specific T Cell Exhaustion in the Tcl1 Mouse Model for Chronic Lymphocytic Leukemia
Source: MDPI journal article supplement (doi:10.3390/ijms22136648), 2021-06-22
Supplement: s1 [file s1]

## **Supplementary Information:**

**Supplemental Figure S1:** T cell populations, survival and tumor development of CLL-transplanted OT1/OT2, OT1 Rag/OT2 Rag and WT mice.

**Supplemental Figure S2:** Depletion of T cells via pan B/CLL cell MACS isolation.

**Supplemental Figure S3:** Endogenous T cell expansion in peripheral blood and spleen after CLL transplantation.

**Supplemental Figure S4:** BCR analysis of CLL transplanted mice.

**Supplemental Figure S5:** PD1 expression based on flow cytometry, FACS and RNA-Seq analysis.

**Supplemental Table S1:** Differentially expressed genes ( $\text{frd} < 0.05$ ) from Volcano plots.
