# Supplementary material for: Evidence for Non-Cancer-Specific T Cell Exhaustion in the Tcl1 Mouse Model for Chronic Lymphocytic Leukemia
Source: Int J Mol Sci. 2021 Jun 22;22(13):6648. doi: 10.3390/ijms22136648 (PMC8268419; doi:10.3390/ijms22136648)
Supplement: Supplementary file 1 [file ijms-22-06648-s001.zip › Table_S1_Volcano_plots_DE_genes.xlsx]

## Sheet: CD8_WT PD1+ vs. PD1-
genes	logFC	logCPM	F	PValue	FDR
Sh3bp5	-9.83981	5.45248	89.3231	1.03636e-07	0.000552053
Dapl1	-8.70397	6.84327	94.9267	1.27711e-07	0.000552053
Il10	4.19436	7.00121	99.6583	5.06681e-08	0.000552053
Lag3	4.06103	9.7043	75.6775	3.00126e-07	0.000973008
Aqp9	-13.332	5.04522	100.742	1.5195e-06	0.00288584
Il7r	-4.01325	8.72639	58.02	1.55775e-06	0.00288584
Coch	11.1046	5.10157	87.7118	1.40387e-06	0.00288584
Ptpn6	-2.59885	8.19859	54.6908	2.22294e-06	0.00360338
Slc16a5	-12.2283	4.77373	76.9571	2.66672e-06	0.00384244
Il6ra	-4.73903	4.49508	49.131	4.19202e-06	0.00452152
Dkc1	-1.80998	7.72127	48.4783	4.53268e-06	0.00452152
Vmp1	1.32892	9.13146	48.6439	4.44338e-06	0.00452152
Glrx	1.46007	7.74583	50.3792	3.61831e-06	0.00452152
Tigit	2.4701	9.14102	47.0824	5.37193e-06	0.00497594
Fntb	-3.15564	5.99426	45.9226	6.20482e-06	0.00536428
Dph5	-2.40986	6.38073	44.5704	7.36671e-06	0.00597072
Gm38999	11.9288	4.09757	69.7665	7.98148e-06	0.00608846
Pdcd1	4.70564	9.50626	43.1656	8.84255e-06	0.00637056
Casp3	2.17022	8.39015	42.6045	9.52369e-06	0.00650017
Nop56	-1.16532	8.97721	42.1005	1.01865e-05	0.00660496
B430306N03Rik	-8.94258	4.3325	40.7195	1.22876e-05	0.0075879
Rpl4	-1.04631	12.1187	39.3332	1.49052e-05	0.00878597
Samd3	-2.92318	6.9116	38.1025	1.77689e-05	0.0100186
Npm1	-1.63039	9.55546	36.5885	2.21863e-05	0.011988
Cd22	-3.67017	7.23596	35.6273	2.56348e-05	0.0127858
Igtp	-1.67071	8.35915	35.8187	2.49021e-05	0.0127858
Plac8	-4.10803	7.32112	34.7734	2.92149e-05	0.0140318
Ifrd2	-2.58122	6.03438	34.4787	3.05799e-05	0.0141629
Gpr183	-2.91073	6.30552	34.2263	3.18066e-05	0.0142231
Nsg2	-5.01082	7.1523	33.1742	3.75578e-05	0.0144408
Hdac10	-2.92622	5.35517	33.2168	3.73032e-05	0.0144408
Fam169b	-1.85337	6.95792	33.0602	3.82488e-05	0.0144408
Nolc1	-1.48422	7.30465	33.2526	3.70909e-05	0.0144408
Agpat3	1.37565	7.89222	32.9429	3.89751e-05	0.0144408
Nsmaf	1.57919	8.04947	33.8386	3.38007e-05	0.0144408
Pno1	-1.34102	6.66404	32.1165	4.4559e-05	0.0156173
Rps4x	-1.20497	9.10632	32.2143	4.38528e-05	0.0156173
Prf1	1.95523	9.5359	31.9362	4.58945e-05	0.0156621
Pik3ip1	-2.70996	6.96438	30.8287	5.51678e-05	0.0163434
Nfil3	7.71571	2.95722	30.5627	5.77002e-05	0.0163434
Ssbp2	-4.89774	5.18621	30.7114	5.62687e-05	0.0163434
Pdlim1	-3.37474	5.68047	30.6776	5.65903e-05	0.0163434
Bzw2	-2.05681	6.85381	30.9647	5.39218e-05	0.0163434
Abhd11	-1.97537	6.40487	30.7653	5.57599e-05	0.0163434
Shmt2	-1.79472	7.28542	31.2234	5.1638e-05	0.0163434
Gramd3	-1.35817	8.93069	30.4676	5.86375e-05	0.0163434
Adgrg1	5.5454	6.93682	33.9021	5.92334e-05	0.0163434
Ifng	2.89271	9.80264	29.674	6.71696e-05	0.018147
Ctla4	3.1186	7.03968	29.3985	7.04551e-05	0.0186462
Emb	-1.81072	8.83331	29.1086	7.41099e-05	0.0188443
Agpat4	1.77878	6.42259	29.1717	7.32967e-05	0.0188443
Ccr7	-10.1098	8.23177	28.5534	8.17276e-05	0.0191092
Pecam1	-3.49902	5.99953	28.499	8.25197e-05	0.0191092
Tgtp1	-3.47298	5.69607	28.821	7.79509e-05	0.0191092
Hspbp1	-1.90225	6.22207	28.5543	8.17145e-05	0.0191092
Vrk1	-1.86872	6.22558	28.7121	7.94636e-05	0.0191092
Igfbp4	-9.77936	4.05867	33.4521	8.65089e-05	0.0196815
Rapgef4	-10.1551	5.04362	27.696	9.53034e-05	0.0196991
Foxp1	-1.33032	8.12665	27.8626	9.24765e-05	0.0196991
Nkg7	1.08241	11.9878	27.7303	9.47132e-05	0.0196991
Ms4a4c	-2.86677	7.60578	27.5862	9.72197e-05	0.0196991
Nop10	-1.45575	7.03906	27.9939	9.03145e-05	0.0196991
Ctsa	0.962241	9.78537	27.92	9.15251e-05	0.0196991
Vamp8	1.29736	7.80593	27.603	9.6923e-05	0.0196991
Mybbp1a	-1.60916	7.93425	27.3842	0.00010086	0.0201224
Snhg1	-2.10825	5.88063	27.2495	0.000103375	0.0203116
Ccl4	2.33259	10.3598	27.1402	0.000105467	0.0204134
Gab3	-1.26561	6.79406	26.9289	0.00010965	0.020911
Entpd1	2.76047	8.47041	26.4614	0.000119591	0.0224763
Trmt1	-2.521	5.891	25.616	0.000140282	0.0243145
Ppan	-1.65379	6.30619	25.6682	0.000138893	0.0243145
Rpl23a	-1.32699	8.60286	25.879	0.000133438	0.0243145
Rpl15	-1.20892	8.68441	25.7091	0.000137815	0.0243145
Arl6ip1	1.1021	9.22322	25.7659	0.000136334	0.0243145
Bmerb1	10.702	2.56561	32.3183	0.000140622	0.0243145
Tox	2.83104	9.15161	25.4205	0.000145629	0.024634
Rps20	-1.6057	8.56533	25.3976	0.000146269	0.024634
Rapgef6	-1.0507	8.96851	24.9659	0.000158976	0.0259156
Epsti1	-1.22578	8.60721	24.9688	0.000158886	0.0259156
Tpm4	1.06117	9.3308	24.873	0.000161873	0.0259156
Car5b	3.03781	6.08221	24.8994	0.000161044	0.0259156
Cdk4	-1.08124	7.75604	24.7607	0.000165452	0.0261656
Sh2d2a	1.19671	10.4794	24.2665	0.000182317	0.0271757
Rps7	-1.24881	9.44799	24.3179	0.000180475	0.0271757
Glcci1	1.88876	6.66871	24.3003	0.000181103	0.0271757
Themis2	3.04924	6.58192	24.4041	0.000177433	0.0271757
Cd244a	4.97459	5.45907	24.3074	0.000180847	0.0271757
Ccl5	1.8292	14.1617	24.1315	0.000187257	0.0275948
Rpl36a	-1.68832	8.02425	24.0742	0.000189398	0.0275968
Osbpl3	1.95293	7.84791	23.9461	0.000194289	0.0279948
Rpl5	-1.14663	8.41711	23.7831	0.000200723	0.0286041
Eef1g	-1.14071	8.95286	23.6686	0.000205386	0.0289505
Chst15	-11.6963	3.27281	25.8098	0.000210186	0.0290817
Gpatch4	-2.32266	5.73532	23.5393	0.000210802	0.0290817
Khnyn	1.54841	6.57928	23.4633	0.00021406	0.0292203
Itgae	-4.91104	5.06257	23.1849	0.000226492	0.0305953
S100a11	1.59597	6.99204	23.1247	0.000229288	0.0306537
AW112010	1.04188	11.0086	23.0386	0.000233353	0.0308788
Tdrp	-8.94871	4.56867	26.3754	0.000245834	0.0310848
Fcgrt	-5.01068	6.19276	22.7956	0.00024528	0.0310848
Atn1	-2.49817	4.81485	22.88	0.000241061	0.0310848
Mdn1	-2.33137	6.46038	22.6341	0.000253588	0.0310848
Gas5	-1.3958	8.53559	22.6384	0.000253364	0.0310848
Rpl12	-1.34606	8.13991	22.73	0.000248616	0.0310848
Pa2g4	-1.12425	7.83734	22.5482	0.000258135	0.0310848
Rpa2	1.235	8.63965	22.5343	0.00025888	0.0310848
Atxn1	1.6134	6.97095	22.6163	0.000254521	0.0310848
Trerf1	1.98219	7.15037	22.8879	0.000240671	0.0310848
Glipr1	1.30557	7.07314	22.3887	0.000266832	0.0317457
Klhl6	-2.49465	8.60284	22.2866	0.00027257	0.0318602
Rps5	-1.25783	10.3552	22.2842	0.000272709	0.0318602
A930005H10Rik	-2.29348	5.16476	22.078	0.000284738	0.0329686
Rpl13	-1.32193	10.1085	21.9564	0.000292118	0.0335237
Lrmp	1.01589	8.29528	21.7818	0.000303093	0.0341783
Calca	10.1738	3.64898	29.1122	0.000301844	0.0341783
Rpl10a	-1.20363	8.09849	21.6188	0.000313769	0.0350772
Litaf	2.3002	6.90223	21.4368	0.000326187	0.0361538
Treml2	-7.92614	6.20987	21.3551	0.000331944	0.0363955
Tgtp2	-1.57652	6.59865	21.3266	0.000333981	0.0363955
Rpl22	-1.50443	7.08079	21.2001	0.000343191	0.0370876
Atic	-2.13342	6.23635	21.1528	0.000346711	0.0371583
Rgs1	2.07942	9.49039	21.003	0.00035812	0.0376852
Rpl6	-0.975622	9.51112	20.9374	0.000363252	0.0376852
Xdh	1.47587	7.68016	20.9941	0.000358812	0.0376852
Sult2b1	3.19402	5.06901	20.9518	0.000362119	0.0376852
Acaa2	-1.25476	6.98559	20.8533	0.000369952	0.0377759
Tmprss6	9.63854	2.98463	20.8895	0.000367053	0.0377759
Cnr2	-6.07242	4.75982	21.5825	0.000377176	0.0379388
Prmt5	-1.63816	6.7849	20.7618	0.000377399	0.0379388
Ech1	1.01663	8.18868	20.7161	0.000381188	0.038025
Adgrg5	-1.82086	8.44958	20.5918	0.000391698	0.0387751
Rps26	-1.24283	8.91718	20.5362	0.00039651	0.0389541
Ctsb	1.3182	9.88611	20.4537	0.000403773	0.0390812
Tmub2	1.55837	6.02947	20.453	0.000403831	0.0390812
Sub1	0.921557	10.3444	20.3901	0.000409469	0.0391502
Tnfaip3	1.97079	7.9441	20.3562	0.000412548	0.0391502
Lat2	4.04062	6.17585	20.3446	0.000413601	0.0391502
Rps6	-1.17382	9.88494	20.3067	0.000417083	0.0391937
Sirt2	1.341	7.55191	20.2257	0.000424632	0.0396161
Rabgap1l	1.55481	7.81146	20.1304	0.000433715	0.0401744
Ampd1	-10.4605	3.20415	24.402	0.000441024	0.0402761
Rack1	-1.12272	9.58813	20.0574	0.000440827	0.0402761
Clec2i	-2.31261	7.00486	19.9878	0.000447721	0.0403198
Ssh2	-1.69938	8.10199	19.9975	0.000446747	0.0403198
Tcf7	-2.60921	8.08844	19.87	0.000459681	0.0411113
Ormdl3	1.24327	7.16756	19.8146	0.00046543	0.0411598
Samsn1	1.95809	7.35896	19.8037	0.000466571	0.0411598
Tspan9	-10.2468	1.90567	25.6348	0.000487628	0.0414687
Slc17a9	-2.37316	6.01198	19.5929	0.000489259	0.0414687
Rpl14	-1.30194	9.89045	19.6402	0.000484059	0.0414687
Rps9	-1.146	10.1056	19.6608	0.000481814	0.0414687
Trpv2	0.960385	7.58885	19.6663	0.000481221	0.0414687
Ociad2	3.38434	6.15553	19.6075	0.000487647	0.0414687
Eef1b2	-1.24171	8.91486	19.3923	0.000512036	0.0425647
Rps8	-1.1037	8.52165	19.4346	0.000507136	0.0425647
Itgb2	0.821768	10.8297	19.4063	0.000510404	0.0425647
Oas2	-8.64828	4.18319	19.9778	0.000527803	0.0433199
Plek	1.49312	8.84117	19.2612	0.000527559	0.0433199
Myc	-2.11809	8.26551	19.1592	0.00054002	0.0440439
Ly6c2	-2.82135	8.94199	18.9745	0.00056343	0.044756
Apex1	-2.30696	6.69527	18.9868	0.000561834	0.044756
Mlh1	-1.60694	5.93282	18.9547	0.000566008	0.044756
Cd69	-1.17879	9.56668	18.9679	0.000564282	0.044756
Rps11	-0.909819	10.3091	18.9755	0.000563305	0.044756
Gnl3	-1.77111	6.57648	18.8891	0.000574639	0.0451631
Il4ra	-1.70445	7.34496	18.803	0.000586212	0.0454629
Rps19	-1.48598	10.1186	18.7317	0.000595982	0.0454629
Grcc10	-1.18879	7.32075	18.7849	0.000588677	0.0454629
Rpl8	-1.1664	9.95003	18.7593	0.000592171	0.0454629
Rpl29	-1.06902	7.59233	18.7511	0.000593309	0.0454629
Rpl21	-1.02348	9.07932	18.6652	0.000605274	0.0459017
Zfas1	-1.72885	6.34151	18.4487	0.000636662	0.0480014

## Sheet: CD4_WT PD1+ vs. PD1-
genes	logFC	logCPM	F	PValue	FDR
Pdcd1	2.9496	9.62117	59.0496	6.39043e-07	0.00814716
Itm2c	1.92859	8.97092	45.9606	3.25893e-06	0.0138494
Dapp1	1.7709	7.46746	46.0201	3.23246e-06	0.0138494
Cd81	2.57608	8.32324	40.3515	7.30828e-06	0.0232933
Ccr9	-11.2867	4.13136	42.9047	9.32543e-06	0.023778

## Sheet: CD8_ OT1 Vb5+ PD1+ vs. PD1-
genes	logFC	logCPM	F	PValue	FDR
Il10	13.0283	7.00121	351.596	7.88644e-12	1.02271e-07
Lag3	8.8137	9.7043	228.427	1.7214e-10	1.11615e-06
Tigit	6.01819	9.14102	200.514	4.31068e-10	1.86336e-06
Glrx	2.92173	7.74583	181.074	8.79323e-10	2.85077e-06
Ccl4	6.20398	10.3598	134.234	6.90351e-09	1.72891e-05
Gzmk	7.20969	9.86964	131.352	7.99928e-09	1.72891e-05
Nsmaf	3.20536	8.04947	123.155	1.23666e-08	2.00463e-05
Casp3	4.03936	8.39015	125.334	1.09868e-08	2.00463e-05
Vmp1	2.13152	9.13146	119.116	1.54758e-08	2.22988e-05
Rora	4.98695	7.02658	109.789	2.66952e-08	3.46184e-05
Car5b	8.34136	6.08221	108.178	2.9453e-08	3.47224e-05
Ctla4	7.03301	7.03968	101.782	4.40939e-08	4.76508e-05
Pdcd1	8.1747	9.50626	93.5563	7.66678e-08	7.64791e-05
Nkg7	2.00889	11.9878	90.713	9.37453e-08	8.25132e-05
Maf	8.92601	6.03358	90.463	9.54425e-08	8.25132e-05
AW112010	2.0708	11.0086	85.9078	1.3338e-07	0.000108105
Chsy1	2.63864	7.30689	82.9933	1.66575e-07	0.000113692
Ccl5	3.66458	14.1617	83.4455	1.6086e-07	0.000113692
Ifng	5.52321	9.80264	84.3286	1.50326e-07	0.000113692
Itgad	6.58156	5.98444	78.9604	2.29126e-07	0.000148565
Dapl1	-7.6485	6.84327	84.5877	2.58578e-07	0.000159678
Fyn	2.15682	8.09452	75.9273	2.93923e-07	0.000173254
Atxn1	3.09659	6.97095	74.4243	3.33574e-07	0.000188078
Prf1	3.06279	9.5359	71.8307	4.17127e-07	0.000208073
Coch	12.8913	5.10157	111.908	4.15567e-07	0.000208073
Adgrg1	15.408	6.93682	86.2723	4.17174e-07	0.000208073
Prr13	2.00568	9.11289	70.5827	4.65624e-07	0.000217841
Casp1	2.69795	7.62829	70.4689	4.70353e-07	0.000217841
Rpa2	2.24617	8.63965	70.0195	4.89577e-07	0.000218925
S100a11	2.91031	6.99204	69.5628	5.10033e-07	0.00022047
Id2	2.31433	9.85901	67.3793	6.22224e-07	0.000252156
Ctsb	2.48692	9.88611	67.4268	6.19505e-07	0.000252156
Gzma	5.27564	9.25923	66.4993	6.75164e-07	0.00026
Ociad2	7.7961	6.15553	66.3965	6.81677e-07	0.00026
Osbpl3	3.42562	7.84791	65.2093	7.62252e-07	0.000282425
Myo1f	2.36378	9.54732	63.0717	9.36131e-07	0.000333482
Entpd1	4.65848	8.47041	62.9049	9.51482e-07	0.000333482
Dkc1	-2.06943	7.72127	62.2415	1.01546e-06	0.000346539
Ccl3	8.69813	9.64382	61.8532	1.05516e-06	0.000350856
Morrbid	5.19504	5.67722	60.9544	1.15399e-06	0.000374125
Nop56	-1.40255	8.97721	60.2964	1.23302e-06	0.000389995
Anxa2	2.86787	9.69175	59.4473	1.34422e-06	0.00041075
Bcl2a1b	3.00253	6.85869	59.319	1.36199e-06	0.00041075
Gramd3	-1.91702	8.93069	58.7624	1.44222e-06	0.000425063
Slc16a5	-13.4186	4.77373	86.6281	1.49271e-06	0.000430166
Havcr2	8.98111	8.0425	57.6029	1.62722e-06	0.000458734
Sh2d1a	2.1732	8.16951	56.3714	1.85376e-06	0.000507721
Aqp9	-13.1448	5.04522	96.1261	1.88388e-06	0.000507721
Tnfrsf1b	2.71607	7.56102	56.0509	1.91844e-06	0.000507721
Rpl4	-1.23357	12.1187	54.2326	2.3376e-06	0.00060628
Esm1	12.7049	4.99283	63.1246	2.39413e-06	0.000608766
Sh2d2a	1.80912	10.4794	53.6299	2.49876e-06	0.000623153
Bcl2a1d	3.97967	5.09759	51.159	3.30527e-06	0.00080873
Sh3bp5	-5.93078	5.45248	50.3897	3.61389e-06	0.000853109
Kif4	12.7208	5.27283	58.3102	3.684e-06	0.000853109
Gimap7	1.65238	9.22264	50.2465	3.67488e-06	0.000853109
Tox2	11.3726	4.88295	49.4342	4.04372e-06	0.000919981
Lax1	2.11806	8.4849	48.9822	4.26705e-06	0.000954052
Abhd11	-2.53084	6.40487	48.556	4.49048e-06	0.000986993
Rgs16	10.179	7.27228	48.4162	4.5667e-06	0.000987016
Klrk1	2.51188	8.71879	47.7202	4.96834e-06	0.00105622
Gem	3.55282	7.38434	47.1043	5.35745e-06	0.00112057
Sub1	1.40868	10.3444	46.6152	5.69116e-06	0.00117148
Litaf	3.52423	6.90223	45.1967	6.80039e-06	0.00129599
Cd68	4.26639	6.21203	45.4982	6.54551e-06	0.00129599
Il4ra	-2.74593	7.34496	45.2715	6.73618e-06	0.00129599
Ctsa	1.22966	9.78537	45.0873	6.89569e-06	0.00129599
Ikzf3	3.21667	8.27006	45.2304	6.77136e-06	0.00129599
Gm38999	12.3439	4.09757	73.0078	6.52365e-06	0.00129599
Arl6ip1	1.46572	9.22322	44.7632	7.18693e-06	0.00131844
Cxcr6	3.45664	9.16253	44.729	7.21845e-06	0.00131844
Glcci1	2.61352	6.66871	44.1099	7.81731e-06	0.00140798
Rps4x	-1.41214	9.10632	43.8062	8.13155e-06	0.00144452
Agpat4	2.21006	6.42259	43.5678	8.38832e-06	0.00147
Stx11	3.98762	6.36207	43.3006	8.68707e-06	0.00150205
Adgrg5	-2.72475	8.44958	43.1169	8.89946e-06	0.00151853
Rabgap1l	2.32031	7.81146	42.6206	9.50328e-06	0.0016005
Serpinb6b	2.47884	8.28974	42.1675	1.00955e-05	0.00167844
Tgtp1	-4.36605	5.69607	41.8405	1.05488e-05	0.00168885
Rpl15	-1.55595	8.68441	41.8415	1.05474e-05	0.00168885
Enpp6	12.7464	5.16452	47.8787	1.0479e-05	0.00168885
Plekhb2	2.22132	7.91396	41.3604	1.12568e-05	0.00175881
Rrm2	5.06193	7.76545	41.3603	1.12571e-05	0.00175881
Xdh	2.1117	7.68016	41.2205	1.14732e-05	0.00177125
Wdr95	3.59676	7.07602	41.0999	1.16635e-05	0.00177943
Fntb	-2.94951	5.99426	40.8286	1.21049e-05	0.00180433
Dnase1l3	7.5944	4.99432	40.8602	1.20525e-05	0.00180433
Itgb2	1.19833	10.8297	40.664	1.23819e-05	0.00182464
S100a4	4.25748	8.08441	40.3374	1.2953e-05	0.00188735
Rps7	-1.62143	9.44799	40.204	1.31949e-05	0.00190123
Rgs1	2.96536	9.49039	39.8075	1.39445e-05	0.00194443
Ubash3b	3.4189	6.74194	39.8627	1.38371e-05	0.00194443
Fasl	3.05203	8.47344	39.8406	1.388e-05	0.00194443
Rpl10a	-1.65061	8.09849	39.722	1.41123e-05	0.0019469
Lbh	1.49595	6.82145	39.6444	1.42666e-05	0.00194747
Plac8	-4.45417	7.32112	39.5172	1.45238e-05	0.00196193
Ier3	4.86106	6.89014	39.2615	1.50569e-05	0.00201297
Igtp	-1.7487	8.35915	39.0297	1.55594e-05	0.00205892
Lcp2	1.20525	9.65933	38.6359	1.64574e-05	0.00211307
Cd82	1.90799	9.75342	38.698	1.63119e-05	0.00211307
Serpinb9	2.30154	8.20442	38.7057	1.62941e-05	0.00211307
Npm1	-1.67356	9.55546	38.4481	1.69061e-05	0.00212852
Carhsp1	4.16887	6.04352	38.4567	1.68852e-05	0.00212852
Trerf1	2.61204	7.15037	37.8712	1.8374e-05	0.00224787
Tmprss13	10.2429	2.7581	43.048	1.81229e-05	0.00224787
Ptpn5	11.2199	5.08203	37.8831	1.83424e-05	0.00224787
Klrc1	4.08227	7.49078	37.4274	1.96021e-05	0.0023757
Eef1b2	-1.73771	8.91486	36.9728	2.09572e-05	0.00250548
Rpl13	-1.73424	10.1085	36.9399	2.10593e-05	0.00250548
Rpl23a	-1.59005	8.60286	36.6457	2.19983e-05	0.00253443
Rpl5	-1.43251	8.41711	36.6194	2.20844e-05	0.00253443
Ormdl3	1.71497	7.16756	36.7538	2.1648e-05	0.00253443
Ikzf2	3.59941	6.51955	36.7254	2.17394e-05	0.00253443
Trps1	4.88049	5.81333	36.3647	2.29394e-05	0.00258677
Tpm4	1.29084	9.3308	36.4055	2.28e-05	0.00258677
Bhlhe40	4.08601	7.67744	35.613	2.56905e-05	0.00287202
Rps19	-2.08293	10.1186	35.46	2.6295e-05	0.00291448
Cnr2	-9.76296	4.75982	37.2785	2.70453e-05	0.00295087
Pik3ip1	-2.90728	6.96438	35.0373	2.80513e-05	0.00295087
Batf	1.7976	7.63895	35.2602	2.7109e-05	0.00295087
Bzw2	-2.20356	6.85381	35.1801	2.74435e-05	0.00295087
Rplp0	-1.52493	11.4905	34.9743	2.83241e-05	0.00295087
Rpl6	-1.26635	9.51112	34.8439	2.88989e-05	0.00295087
Lrmp	1.29463	8.29528	34.9341	2.85e-05	0.00295087
Agpat3	1.41769	7.89222	34.88	2.87384e-05	0.00295087
Tnfaip3	2.65361	7.9441	35.149	2.75746e-05	0.00295087
Csf1	13.2949	5.95098	39.4205	2.82564e-05	0.00295087
Eef1g	-1.38911	8.95286	34.6872	2.9607e-05	0.00299956
Prdm1	4.93243	6.1885	34.2729	3.1576e-05	0.00304005
Rnf216	5.20054	5.72535	34.2523	3.16775e-05	0.00304005
Cd226	-3.73545	6.40075	34.3929	3.09907e-05	0.00304005
Gab3	-1.43138	6.79406	34.1643	3.21165e-05	0.00304005
Rpl21	-1.40224	9.07932	34.4429	3.07506e-05	0.00304005
Rps11	-1.23504	10.3091	34.5032	3.04635e-05	0.00304005
Vamp8	1.45105	7.80593	34.2083	3.18959e-05	0.00304005
Birc5	5.25585	6.3424	34.2683	3.15985e-05	0.00304005
Ube2c	12.1188	5.57308	38.6439	3.12027e-05	0.00304005
Dph5	-2.07372	6.38073	33.9252	3.33433e-05	0.0031333
Igfbp4	-12.7169	4.05867	40.7776	3.45625e-05	0.00322451
Ptms	7.20266	3.66645	33.603	3.50821e-05	0.0032496
Rpl36a	-2.00656	8.02425	33.3332	3.66174e-05	0.00332066
Rps20	-1.85493	8.56533	33.3922	3.62754e-05	0.00332066
Mif4gd	2.45702	7.17325	33.3347	3.66088e-05	0.00332066
Lime1	1.18027	9.15083	33.2823	3.69154e-05	0.00332444
Hmgb2	2.0754	8.23144	33.0036	3.85978e-05	0.00345198
Tox	3.2817	9.15161	32.8405	3.96224e-05	0.00347506
Rpl12	-1.62996	8.13991	32.8346	3.96598e-05	0.00347506
Gm6637	4.1898	5.00448	32.8843	3.93439e-05	0.00347506
Il10ra	2.17575	7.63568	32.6426	4.09073e-05	0.0035603
Rpl35	-1.94914	9.00134	32.5002	4.18611e-05	0.00361903
Rps5	-1.52593	10.3552	32.3493	4.28993e-05	0.00368423
Rpl14	-1.68206	9.89045	32.1165	4.45591e-05	0.00370412
Rps6	-1.48805	9.88494	32.1356	4.44199e-05	0.00370412
Rps8	-1.43012	8.52165	32.1295	4.44647e-05	0.00370412
Asf1b	2.44353	7.06642	32.1697	4.41732e-05	0.00370412
Spp1	12.1383	6.23789	33.9885	4.35113e-05	0.00370412
Tdrp	-13.6038	4.56867	38.3733	4.60001e-05	0.00379955
Il6ra	-3.5971	4.49508	31.7732	4.71414e-05	0.00386917
Frmd4b	3.6812	6.77982	31.5512	4.8901e-05	0.00396712
Filip1	11.8537	3.48886	37.8662	4.89465e-05	0.00396712
Wdr1	1.12187	9.40901	31.4208	4.997e-05	0.00400007
Ctsd	1.27776	10.2452	31.4479	4.97461e-05	0.00400007
Hip1r	2.49878	6.88386	31.3478	5.05794e-05	0.00402401
Rcsd1	-1.47006	7.25883	31.1754	5.20538e-05	0.00409111
Aplp2	2.32179	7.28062	31.2008	5.18337e-05	0.00409111
Acsbg1	2.06287	7.57263	31.0891	5.28099e-05	0.00412554
Rps24	-1.82156	8.83818	30.803	5.54065e-05	0.00427685
Arsb	2.23721	7.46926	30.8215	5.52341e-05	0.00427685
Kif15	5.93046	5.54997	30.7282	5.61097e-05	0.00428018
Arhgap11a	2.961	5.22877	30.7512	5.58922e-05	0.00428018
Casp4	2.51774	5.9967	30.6039	5.72994e-05	0.00434537
Fam169b	-1.77635	6.95792	30.5321	5.79999e-05	0.00437292
Tgtp2	-1.90433	6.59865	30.4872	5.84432e-05	0.00438087
Rpl3	-1.32478	10.4716	30.391	5.94056e-05	0.00442742
Irf8	3.14044	6.80032	30.318	6.01474e-05	0.00445709
Tnfsf8	-11.3031	6.11574	30.2644	6.0699e-05	0.00447242
Mybbp1a	-1.69437	7.93425	30.2228	6.11307e-05	0.00447873
Etfb	1.18996	7.79463	30.1264	6.21455e-05	0.00447873
Ttc39b	2.11182	7.25088	30.1853	6.15232e-05	0.00447873
Samsn1	2.46141	7.35896	30.1245	6.21662e-05	0.00447873
Rapgef4	-9.59773	5.04362	30.0179	6.331e-05	0.00451101
Stil	10.2689	4.0894	30.0255	6.32276e-05	0.00451101
Themis2	3.44902	6.58192	29.9737	6.37923e-05	0.00452054
Rps9	-1.41919	10.1056	29.7614	6.6165e-05	0.00463987
Lgals3	3.77502	8.43616	29.759	6.61919e-05	0.00463987
Prrc2b	1.4056	7.63435	29.711	6.6742e-05	0.00465328
Cd38	3.64178	8.28768	29.4863	6.93885e-05	0.00481192
Itgal	1.04222	9.89986	29.3681	7.08284e-05	0.00488565
Slc25a24	4.1913	6.02704	29.1263	7.38814e-05	0.00506928
Rpl32	-1.67378	10.9476	28.9831	7.57592e-05	0.00514369
Rpl18	-1.28667	8.896	28.9884	7.56886e-05	0.00514369
Rpl18a	-1.28293	10.1802	28.944	7.62811e-05	0.00515215
Plscr1	3.51722	5.03607	28.736	7.91278e-05	0.00531673
Penk	8.24772	6.47066	28.4397	8.33945e-05	0.00557454
Lef1	-2.44648	7.65929	28.3542	8.4674e-05	0.00558888
Pglyrp1	1.68978	7.82546	28.3697	8.44409e-05	0.00558888
Pmaip1	2.00468	7.64737	28.3391	8.49019e-05	0.00558888
Lgals1	1.90915	9.31512	28.2612	8.60902e-05	0.00563847
Atic	-2.49605	6.23635	28.1306	8.81265e-05	0.00568569
Haao	-1.61289	6.11678	28.1312	8.8116e-05	0.00568569
Sirt2	1.59523	7.55191	28.184	8.72876e-05	0.00568569
Rpl9	-1.65341	9.38067	28.07	8.90885e-05	0.00571931
Dpysl2	1.62465	7.5412	27.7709	9.40198e-05	0.00597671
Sytl2	3.40661	7.49012	27.788	9.37302e-05	0.00597671
Acot7	1.76386	7.66444	27.7146	9.49819e-05	0.00600842
Cyb5a	-1.28583	7.38099	27.4549	9.95685e-05	0.00626798
Phactr2	10.6813	4.25288	27.401	0.000100552	0.00629934
Ms4a4c	-2.85339	7.60578	27.3169	0.000102109	0.00636611
Snx10	1.54797	7.36456	27.2467	0.000103428	0.00641748
Rps3	-1.18418	10.7929	27.1916	0.000104478	0.00645175
Ppan	-1.69346	6.30619	26.8766	0.000110715	0.00677244
Arhgap15	-1.02191	8.58832	26.9014	0.000110209	0.00677244
Ptpn6	-1.76277	8.19859	26.7302	0.000113758	0.00689349
Rpl8	-1.40053	9.95003	26.748	0.000113382	0.00689349
Cd3e	1.19527	10.5885	26.6505	0.000115452	0.00693721
Syt11	2.48577	7.6373	26.646	0.000115549	0.00693721
Lgalsl	3.08955	5.58159	26.5513	0.000117603	0.00702799
Naca	-0.953445	8.88356	26.473	0.000119333	0.00709865
Fcgrt	-5.54821	6.19276	26.4079	0.000120793	0.0071527
Hspbp1	-1.82261	6.22207	26.3357	0.000122437	0.00721711
Prpf18	1.62589	7.04739	26.3113	0.000122997	0.00721733
Acaa2	-1.40889	6.98559	26.0695	0.000128718	0.007519
Emb	-1.70681	8.83331	26.0335	0.000129597	0.00753637
Ccr7	-8.9724	8.23177	25.9378	0.000131962	0.00761395
Adam17	1.41535	7.13368	25.9321	0.000132105	0.00761395
Rps27a	-1.67321	8.94733	25.7421	0.000136954	0.00785127
Rpl29	-1.25743	7.59233	25.7237	0.000137434	0.00785127
Myc	-2.47971	8.26551	25.5659	0.000141631	0.00801555
Evl	-2.00274	7.69914	25.5736	0.000141423	0.00801555
Ncald	4.19745	6.12983	25.5286	0.000142645	0.00801555
Smim3	5.25381	5.39158	25.5236	0.000142782	0.00801555
Tnfrsf9	3.01144	7.88284	25.3857	0.000146604	0.00814174
Cox7a2l	-0.995889	7.828	25.3747	0.000146913	0.00814174
Plekhf1	4.1311	5.49695	25.398	0.000146259	0.00814174
Calca	11.5128	3.64898	34.7982	0.000150414	0.00830028
H2-DMa	-2.14287	6.45044	25.093	0.000155108	0.0084871
Rpsa	-1.44478	8.85615	25.108	0.00015466	0.0084871
Foxp1	-1.25672	8.12665	24.9736	0.000158739	0.00861306
Aplp1	8.37802	2.1448	24.9918	0.000158178	0.00861306
Il7r	-2.45002	8.72639	24.8707	0.000161943	0.00867802
Wdr12	-2.24672	5.90242	24.8816	0.000161601	0.00867802
Fgl2	2.35343	7.2646	24.8747	0.000161819	0.00867802
Rps12	-1.80794	7.07206	24.8097	0.000163878	0.00874556
Klre1	2.78645	6.83413	24.7541	0.000165666	0.00880476
Ica1	8.2738	4.79531	24.7253	0.0001666	0.00881823
A930005H10Rik	-2.43228	5.16476	24.6245	0.000169915	0.00895714
Lxn	2.3192	5.18165	24.5364	0.000172874	0.00907625
Ska1	9.15406	3.51101	26.8879	0.000174895	0.00914531
Nsg2	-4.10603	7.1523	24.403	0.00017747	0.00924269
Rps14	-1.43893	10.1723	24.3676	0.000178714	0.00927025
Ccnb2	4.88414	6.58199	24.3444	0.000179531	0.00927556
Glipr1	1.36395	7.07314	24.298	0.000181184	0.00928693
Itga4	2.85548	9.36879	24.3096	0.000180768	0.00928693
Pbk	7.14663	4.16853	24.212	0.000184292	0.00940907
Bcl2	-1.39395	9.14411	24.1757	0.000185623	0.00943985
Klf10	2.51379	7.62247	23.9918	0.000192527	0.00975269
Satb1	-2.77883	6.23073	23.936	0.000194681	0.00981333
Arid5b	1.99504	6.50574	23.9217	0.000195237	0.00981333
Cpm	-10.4482	3.94155	24.8276	0.000200248	0.0100263
Mapre2	1.53229	7.36973	23.7056	0.000203865	0.0101598
Pdlim1	-2.90148	5.68047	23.6546	0.000205964	0.0101598
Tent5c	1.99119	6.52612	23.6866	0.000204645	0.0101598
Bmerb1	10.0599	2.56561	29.4862	0.000206047	0.0101598
Rps15a	-1.44023	8.96854	23.5896	0.000208676	0.0102504
Rpl11	-1.34248	8.90508	23.5431	0.000210638	0.0103078
Shmt2	-1.54168	7.28542	23.3971	0.000216943	0.0105764
Olfml3	-10.6848	3.98441	25.5013	0.000221755	0.0107705
Rps3a1	-1.29301	9.66387	23.2118	0.000225257	0.0108342
Ptk2b	1.12609	8.39028	23.2049	0.000225572	0.0108342
Gas7	2.54258	6.40568	23.2063	0.000225506	0.0108342
Gnl3	-1.97178	6.57648	23.1391	0.000228618	0.0108997
Rsl1d1	-1.08923	8.5687	23.1568	0.000227794	0.0108997
Tmsb10	-1.26342	11.2193	23.0888	0.000230974	0.0109717
Haus1	-2.18755	5.23923	23.0108	0.000234684	0.0111072
Cyth4	0.898122	9.20843	22.8984	0.000240152	0.0113247
Rplp1	-1.37891	8.99837	22.8475	0.000242673	0.011361
H3f3b	1.03696	10.5618	22.8523	0.000242438	0.011361
Rps18	-1.72927	9.40239	22.7623	0.000246966	0.0115203
Grcc10	-1.31145	7.32075	22.7363	0.000248295	0.0115408
Plek	1.62273	8.84117	22.5725	0.000256843	0.0118955
Chst12	2.06528	6.81974	22.5197	0.000259667	0.0119835
Sell	-2.12679	10.2113	22.3979	0.000266319	0.0121982
Nop10	-1.29659	7.03906	22.3831	0.000267141	0.0121982
Npc2	-0.91984	9.26227	22.392	0.000266646	0.0121982
Izumo1r	4.00899	5.06037	22.3504	0.000268966	0.0122384
Ech1	1.05587	8.18868	22.2813	0.000272872	0.0123296
Map6	7.31389	4.68872	22.2822	0.000272824	0.0123296
Prkar1a	0.960657	9.73834	22.1883	0.00027823	0.012467
S100a6	1.99413	9.0992	22.1891	0.000278181	0.012467
Faxc	11.5052	3.6247	24.2119	0.000278796	0.012467
Kif2c	6.47782	5.17622	22.1117	0.000282733	0.0125996
Pld3	0.920722	8.9594	22.0609	0.000285762	0.0126476
Ywhah	1.16256	7.19626	22.066	0.000285461	0.0126476
Nmb	2.22715	4.87443	22.0051	0.000289139	0.0127103
Hip1	4.43702	6.73073	22.0093	0.000288884	0.0127103
Rack1	-1.1758	9.58813	21.9469	0.000292701	0.0128235
Pik3ap1	2.96338	7.63756	21.8618	0.00029801	0.0129685
Map2	9.99633	3.70055	21.8692	0.000297543	0.0129685
Cd7	1.47096	9.67965	21.7255	0.000306734	0.0130197
Ndfip2	2.10925	6.51242	21.718	0.00030722	0.0130197
Tsc22d3	-2.11329	9.10994	21.7264	0.000306675	0.0130197
Gas5	-1.36681	8.53559	21.7551	0.000304811	0.0130197
Slc44a2	-1.0296	9.23031	21.7772	0.000303393	0.0130197
Bscl2	1.32321	7.60438	21.7624	0.000304344	0.0130197
Prr11	9.5448	4.29184	21.807	0.000301485	0.0130197
4930428O21Rik	10.4129	1.99508	25.1337	0.000301395	0.0130197
Sec23b	0.980197	7.28729	21.6836	0.000309473	0.0130725
Pbxip1	0.962307	7.93988	21.6358	0.000312634	0.0131631
Ccl6	8.44788	5.16407	21.5292	0.000319813	0.0134218
Glg1	1.80714	6.23902	21.3376	0.000333193	0.0139382
Cep250	1.57957	7.63367	21.2819	0.000337205	0.014025
Med7	1.66497	6.2235	21.2788	0.00033743	0.014025
Zfas1	-1.86042	6.34151	21.2281	0.000341128	0.0141334
Rps26	-1.26289	8.91718	21.1852	0.000344294	0.0142191
Slc17a9	-2.47125	6.01198	21.0905	0.000351403	0.0143693
Snhg5	-1.51665	6.24047	21.1132	0.00034968	0.0143693
Calm2	0.975604	8.78664	21.0708	0.000352905	0.0143693
Map2k3	1.5699	6.26304	21.0633	0.000353472	0.0143693
Top2a	3.69917	8.16523	21.1066	0.000350186	0.0143693
Gm19723	9.50536	2.08324	22.8824	0.000356157	0.0144333
Serpine2	13.1694	4.63493	22.8451	0.000358665	0.0144896
Vps54	1.856	6.11875	20.9679	0.000360854	0.0145328
Rpl23	-1.27743	8.30632	20.934	0.000363516	0.0145947
Arap2	2.26491	7.22794	20.9124	0.000365229	0.0146182
Irf2	1.46528	8.51272	20.8785	0.000367925	0.0146399
Ptpn7	1.64188	8.63766	20.8772	0.00036803	0.0146399
Hsd3b7	-9.62166	2.01808	22.6774	0.000370177	0.0146803
Rilpl2	1.25431	6.68352	20.8208	0.000372576	0.0147304
Eif3e	-1.083	9.0206	20.7632	0.000377282	0.0147972
Plekha2	1.08579	8.25287	20.7583	0.00037769	0.0147972
Alcam	4.92455	4.87158	20.7828	0.000375678	0.0147972
Rpl17	-1.42433	8.60219	20.6986	0.000382648	0.0149463
Lcp1	1.01622	11.9709	20.6513	0.000386631	0.0150565
Gart	-1.71973	7.09962	20.6259	0.000388781	0.015095
Pdgfb	4.20956	5.12291	20.5932	0.000391583	0.0151583
Perp	10.6279	3.30786	22.2754	0.00039956	0.0154211
Zap70	0.992396	9.35535	20.4778	0.000401634	0.0154331
Traf2	1.16174	7.33396	20.444	0.000404632	0.0154331
Adora2a	1.89164	7.15662	20.4484	0.000404243	0.0154331
Gzmb	3.1892	11.8311	20.4606	0.000403156	0.0154331
Dnajc15	-1.56003	7.64211	20.407	0.000407945	0.0154685
Efhd2	2.11914	7.85424	20.4158	0.000407158	0.0154685
Nab1	2.43277	7.56043	20.3406	0.000413975	0.0156059
Rab19	1.34537	7.06756	20.3435	0.000413708	0.0156059
Rapgef6	-0.944056	8.96851	20.2457	0.00042276	0.0157753
Slamf7	1.86814	8.19855	20.2786	0.000419687	0.0157753
Ftsj3	-1.41727	7.24174	20.2634	0.000421104	0.0157753
Sult2b1	3.13372	5.06901	20.2395	0.000423335	0.0157753
Pag1	-4.77542	4.2031	20.157	0.000431158	0.0158894
Ivd	-2.35616	5.37533	20.1556	0.000431298	0.0158894
Rpl10	-1.1445	8.73397	20.1927	0.000427757	0.0158894
Bcap29	-1.14327	7.25178	20.1765	0.0004293	0.0158894
Pqlc3	1.68289	6.66523	20.0912	0.000437519	0.0159428
Gpd2	2.9189	6.92233	20.116	0.000435103	0.0159428
Chst2	8.1711	1.9731	20.0897	0.000437666	0.0159428
Calcb	13.8522	4.94046	22.9727	0.000437305	0.0159428
Ifngr2	-9.37454	2.47709	20.0709	0.000439494	0.0159646
Aopep	1.13933	7.61421	19.9222	0.000454331	0.0164575
Rpl19	-1.16879	9.52367	19.9057	0.000456012	0.0164723
Incenp	1.91275	6.47575	19.8617	0.000460537	0.0165896
Hmox1	3.98128	5.13373	19.8158	0.000465296	0.0167146
Rps17	-1.48011	7.26074	19.7926	0.000467728	0.0167555
Chst15	-9.67347	3.27281	21.3415	0.000478869	0.0171074
Treml2	-7.3579	6.20987	19.6563	0.000482302	0.0171827
Tspan9	-10.4336	1.90567	25.5619	0.000492808	0.0174882
Rps25	-1.49406	8.50996	19.5541	0.000493574	0.0174882
Klhl6	-2.31252	8.60284	19.4366	0.0005069	0.0175762
Exosc7	-1.22043	6.52976	19.472	0.000502844	0.0175762
Nfatc1	1.12822	8.01726	19.511	0.000498415	0.0175762
Ap3b1	1.1433	7.45564	19.4444	0.000506002	0.0175762
Lamp2	1.5214	6.96593	19.4714	0.000502917	0.0175762
Elmo2	1.71729	7.15173	19.4592	0.000504308	0.0175762
Rhoc	3.03513	4.77191	19.4757	0.000502417	0.0175762
Glp1r	11.8181	3.42737	21.0765	0.000504595	0.0175762
Plk3	3.47997	4.0136	19.3669	0.000514998	0.0178093
Eya2	-10.1753	3.71167	19.3391	0.000518276	0.0178276
Tap2	0.785521	8.7765	19.3406	0.000518095	0.0178276
Kmt2e	1.30923	8.69239	19.3067	0.00052211	0.017912
Nacc2	-11.7482	3.55118	23.3321	0.000525163	0.0179692
Ncf1	-2.73902	5.24691	19.2418	0.000529907	0.0180737
Dap	0.972208	7.61313	19.2327	0.000531005	0.0180737
Rad21	1.32218	7.65238	19.1892	0.000536324	0.0182069
St8sia1	-11.5029	2.7552	24.9619	0.000538059	0.0182181
Rbl2	2.26858	8.40629	19.1566	0.000540338	0.0182389
Slc37a2	5.12701	5.47631	19.1474	0.000541485	0.0182389
Ptbp3	1.01834	8.11563	19.118	0.000545147	0.0183147
Baiap3	2.05218	8.79727	19.097	0.000547782	0.0183556
Laptm5	0.949005	11.4376	19.0813	0.000549755	0.0183743
Eea1	2.81573	4.65929	19.0496	0.000553774	0.0184137
Ccl9	12.3562	4.84966	20.613	0.00055353	0.0184137
Mettl2	-2.12191	5.48701	19.0127	0.000558496	0.0185232
Kremen2	2.15168	5.64555	18.9974	0.000560468	0.0185412
Tpx2	4.49532	6.16857	18.8589	0.000578664	0.019046
Usp18	-2.34686	6.52301	18.863	0.000578127	0.019046
Atn1	-2.24326	4.81485	18.8346	0.000581931	0.019105
Rab8b	1.45323	8.24071	18.7921	0.000587697	0.0192456
Uba52	-1.15328	8.94851	18.7676	0.000591034	0.0192576
Tes	0.742974	8.1288	18.7695	0.00059078	0.0192576
Ifi47	-0.965671	8.76935	18.7539	0.000592915	0.0192705
Leprot	1.59142	6.42697	18.7356	0.000595439	0.0193041
Inpp4b	-1.47562	7.92111	18.6887	0.000601974	0.0194673
Snhg16	-1.49481	5.43632	18.6146	0.00061244	0.0197565
Ifrd2	-1.84233	6.03438	18.569	0.000619	0.0198693
Rps10	-1.15767	7.4729	18.5748	0.000618152	0.0198693
Snhg1	-1.71439	5.88063	18.529	0.00062481	0.0200063
Eomes	1.84111	6.74257	18.4375	0.000638331	0.0203388
Rps23	-1.39871	8.76068	18.4458	0.000637097	0.0203388
Pprc1	-2.54871	6.04388	18.3674	0.000648913	0.0206253
Rrp9	-1.41503	6.20919	18.3516	0.000651337	0.0206517
Sh3pxd2a	-8.48302	1.84942	18.278	0.000662706	0.0207714
Add1	-1.33359	8.07616	18.2842	0.000661739	0.0207714
Qdpr	-1.30057	6.52881	18.2901	0.000660825	0.0207714
Yaf2	2.27591	5.41802	18.2651	0.000664724	0.0207714
Ms4a4a	3.87231	4.02541	18.314	0.000657124	0.0207714
Cdk1	3.99003	5.4737	18.2738	0.00066337	0.0207714
Akna	1.39091	9.55206	18.211	0.000673268	0.0209878
B430306N03Rik	-4.76368	4.3325	18.1827	0.000677788	0.0210781
Nifk	-1.09317	6.47492	18.168	0.000680144	0.0211007
Rpl27a	-1.27915	7.47241	18.1525	0.000682637	0.0211275
Cbx7	-2.0497	5.53883	18.1413	0.000684459	0.0211335
Rps15	-1.32023	8.79554	18.1249	0.000687114	0.0211651
Nme4	-11.2208	2.30314	19.5174	0.0006927	0.0212866
Itpk1	1.69659	5.9943	18.056	0.000698426	0.0213257
5830432E09Rik	2.86099	4.04292	18.0531	0.000698905	0.0213257
Lrrc9	9.82476	2.86622	18.7035	0.000697711	0.0213257
Kif13b	2.15599	5.9763	18.0384	0.00070136	0.0213503
Itgae	-4.14078	5.06257	18.0229	0.000703938	0.0213786
Pik3cg	1.23741	7.32523	17.9939	0.000708812	0.0214763
Prc1	4.22064	6.01374	17.8151	0.000739697	0.0223599
Snhg15	-2.63682	5.42896	17.7927	0.000743675	0.0224279
Rpl31	-1.55284	7.37487	17.6838	0.000763348	0.0228912
Rpl7	-0.855892	9.42228	17.6784	0.000764335	0.0228912
Atp6v0a2	1.07649	8.01081	17.6963	0.000761054	0.0228912
Npm3	-1.44057	6.79819	17.6246	0.000774285	0.0230369
Rps16	-1.25069	8.51121	17.6233	0.000774527	0.0230369
Cltc	1.28032	7.4907	17.6284	0.000773587	0.0230369
Hmces	1.27622	6.07496	17.6058	0.000777808	0.0230815
Arpc1b	0.60766	11.2572	17.5396	0.000790317	0.0233992
Tnfsf4	5.01467	4.6494	17.5243	0.000793237	0.0234321
Apaf1	2.01598	5.47914	17.499	0.000798098	0.0234843
Pear1	2.77376	5.36741	17.4963	0.000798625	0.0234843
Eif4enif1	2.36412	6.24665	17.4766	0.000802429	0.0235427
Ide	1.63067	7.72007	17.4548	0.000806681	0.0236141
Ctnnbl1	-1.16488	7.23335	17.4128	0.00081493	0.0238018
Tspo	0.820816	8.56972	17.3786	0.000821709	0.0239356
Itih5	5.65545	6.22542	17.3712	0.000823202	0.0239356
Ly6c2	-2.68382	8.94199	17.3516	0.000827119	0.0239957
Rplp2	-1.37769	8.05971	17.3184	0.000833827	0.0241363
Adpgk	-4.01243	3.7325	17.2789	0.000841885	0.0242075
Calr	0.898953	8.9852	17.2884	0.000839933	0.0242075
Slc25a19	1.56681	6.94534	17.2877	0.00084008	0.0242075
2900005J15Rik	-10.759	1.72495	19.4582	0.000846301	0.0242806
Stk39	4.68555	4.23526	17.2361	0.000850703	0.0243082
Dlg2	11.3741	2.7072	18.5453	0.000851012	0.0243082
Rpl37a	-1.311	8.66998	17.2138	0.000855341	0.0243699
Tbc1d4	4.57603	5.11034	17.7975	0.000856932	0.0243699
Nucb2	-11.2243	3.24032	20.4722	0.00086266	0.0244792
Ppp1r16b	1.71166	5.44408	17.1051	0.000878373	0.0248164
Irak2	2.38181	6.41384	17.1113	0.000877039	0.0248164
Cnn3	-11.2973	3.07842	18.2672	0.000903737	0.0254775
Pusl1	-2.44391	4.44548	16.9296	0.000917065	0.0257972
Ttn	4.51635	6.41168	16.9055	0.000922522	0.0258945
Rpl24	-1.23107	7.82335	16.8682	0.000931061	0.0260777
Rpl37	-1.21084	8.36256	16.8073	0.00094517	0.0264159
Ampd1	-8.06907	3.20415	19.9218	0.000954299	0.0264431
Pld4	-6.59394	5.15837	16.7799	0.000951612	0.0264431
Rpl35a	-1.41208	7.33829	16.778	0.000952048	0.0264431
Cd101	3.46384	7.08458	16.7688	0.000954216	0.0264431
Pepd	-1.47403	6.85041	16.7524	0.000958111	0.0264921
Ncaph	3.22295	6.13547	16.6455	0.000983894	0.0270921
Sun2	-2.07032	5.87631	16.6333	0.000986871	0.0270921
Hcls1	0.79994	8.76169	16.6298	0.000987724	0.0270921
1700019D03Rik	9.27865	1.88721	17.8589	0.000988169	0.0270921
Rasa4	-9.62108	3.42398	16.6148	0.000991434	0.0271243
Wee1	9.33673	2.5315	17.1114	0.00100553	0.0274521
Far1	1.41671	7.30114	16.549	0.00100783	0.027457
Ret	11.36	3.74074	17.7121	0.00102074	0.0277506
Gpr65	1.3395	7.53524	16.4755	0.00102652	0.0278491
Qtrt1	-1.43109	5.44447	16.4612	0.00103019	0.0278904
Atf6	1.89628	6.26038	16.411	0.00104323	0.0281733
Usp28	-4.09943	5.49088	16.4014	0.00104573	0.0281733
Crot	1.21178	8.00173	16.389	0.001049	0.0281733
Gata3	1.57488	6.81453	16.3877	0.00104933	0.0281733
Zbtb32	3.61665	5.66005	16.3749	0.00105273	0.0282061
Ccser2	1.43865	6.19504	16.3403	0.00106192	0.0283353
Myom2	6.83294	4.25079	16.3434	0.00106109	0.0283353
She	-11.3435	2.02208	19.3214	0.00106771	0.0283686
Gm19585	1.02336	7.89596	16.3185	0.00106776	0.0283686
Rhof	1.41904	7.04815	16.3111	0.00106973	0.0283686
Wipf1	1.32448	9.12169	16.2703	0.00108079	0.0285536
Ccrl2	5.46539	5.12258	16.2691	0.00108111	0.0285536
Hspe1	-1.54245	6.42029	16.2257	0.00109301	0.0288092
Rpl22	-1.30877	7.08079	16.2102	0.00109728	0.0288518
Ehd4	2.3624	5.11492	16.2038	0.00109908	0.0288518
Tfrc	-2.77519	6.17679	16.1926	0.00110219	0.0288752
Dgka	-1.39648	9.25492	16.1378	0.00111755	0.0292186
Taf1d	-1.53468	6.70789	16.1206	0.00112246	0.0292588
Mis12	1.65548	5.38399	16.1165	0.0011236	0.0292588
Mir22hg	4.18144	3.9146	16.1072	0.00112627	0.0292694
2210408F21Rik	9.54325	1.44396	18.025	0.00113325	0.0293919
Ccdc107	-1.84121	5.68316	16.0656	0.00113821	0.0294582
Pfn1	0.830298	10.8367	16.0582	0.00114035	0.0294582
Spry1	9.60211	2.02256	17.1903	0.00114699	0.029571
Eef1a1	-0.87691	12.3101	16.0234	0.00115046	0.0296015
Zfp382	1.90836	5.75523	16.0127	0.00115359	0.0296233
Pecam1	-2.50242	5.99953	15.9795	0.00116339	0.0297972
Adam19	1.92409	8.33536	15.9742	0.00116496	0.0297972
Ucp2	0.954849	10.3845	15.8657	0.00119764	0.0305127
Smtn	7.99574	2.41018	17.0061	0.00119579	0.0305127
Tnip3	3.57335	5.09902	15.8259	0.00120989	0.0307644
Rnasek	1.22616	6.65996	15.7881	0.00122166	0.0310029
Bub1	11.7465	4.76379	16.8582	0.00123674	0.0313242
Skap2	1.3549	6.08799	15.613	0.00127792	0.0323043
Slfn1	-1.50134	8.23499	15.6017	0.00128165	0.0323354
Rpl36	-1.3923	8.42069	15.5648	0.00129392	0.0325816
Prex1	1.43865	7.62817	15.538	0.00130291	0.0327445
Rgs10	-5.07598	5.33523	15.4954	0.00131735	0.0330434
Dnajc9	1.26176	8.46082	15.4854	0.00132075	0.0330647
Rtkn	10.6537	2.8938	16.5204	0.00133649	0.0333942
Mapk11	-4.97837	3.57985	15.3359	0.00137306	0.034242
Mesd	-1.37886	5.96423	15.3265	0.00137641	0.0342597
Spc24	2.63156	5.19652	15.2656	0.00139848	0.034647
Pcsk7	1.23417	6.40217	15.2614	0.00139999	0.034647
Tank	1.60228	7.48415	15.2737	0.00139553	0.034647
Nme2	-1.70829	7.49007	15.2399	0.00140789	0.0347763
Jaml	-3.41311	7.16661	15.1829	0.00142904	0.0352316
Slpi	-11.0755	3.89568	16.1893	0.0014434	0.0353589
Apex1	-2.04021	6.69527	15.1402	0.00144511	0.0353589
Samd3	-1.76567	6.9116	15.1496	0.00144158	0.0353589
Rap1gap2	2.20527	5.82364	15.1471	0.0014425	0.0353589
Gapdh	0.750475	8.43482	15.1284	0.0014496	0.035402
Capzb	0.770449	10.211	15.1024	0.00145954	0.0354454
Nsd2	2.72841	4.90994	15.1069	0.0014578	0.0354454
Sdcbp2	3.89625	6.51761	15.1023	0.00145958	0.0354454
Pimreg	10.0129	3.23732	16.1071	0.00147145	0.035667
Pclaf	4.59934	6.55096	15.0551	0.0014778	0.035754
Acly	0.82608	8.30418	15.013	0.00149428	0.0360182
Rad54l	6.75323	4.40468	15.0186	0.00149207	0.0360182
Rab27a	1.38891	8.0472	14.9917	0.00150269	0.0361537
Nusap1	5.67029	6.00902	14.954	0.00151771	0.0361915
Rpl39	-1.59428	6.51656	14.9726	0.00151026	0.0361915
Ubxn8	1.13661	6.49299	14.96	0.00151528	0.0361915
Trip12	1.18662	8.24753	14.9527	0.00151821	0.0361915
Dynlt3	1.50089	5.54448	14.962	0.0015145	0.0361915
Stat3	0.849931	8.9003	14.93	0.00152736	0.0363427
Sh3bgrl	1.48274	6.87225	14.9025	0.00153849	0.0365084
Tuba1c	1.71397	5.32494	14.8989	0.00153995	0.0365084
Eif3i	-1.15976	8.07041	14.8896	0.00154374	0.0365315
Mki67	3.76813	7.66743	14.8588	0.00155639	0.0366799
Dock2	0.912443	9.81112	14.8594	0.00155614	0.0366799
Srpr	0.986669	7.26102	14.8333	0.00156698	0.0366799
Actg1	1.02644	8.35651	14.8392	0.00156451	0.0366799
Stmn1	2.22182	6.36101	14.8371	0.00156538	0.0366799
Nrn1	7.14239	2.45824	15.3111	0.00155872	0.0366799
Gbp3	1.19433	7.30974	14.8158	0.00157427	0.0367841
Matk	-5.68637	4.24492	14.789	0.0015855	0.0369799
Ctu2	-1.6385	5.36622	14.7591	0.00159816	0.0371867
Ndrg3	-1.07995	7.14144	14.7428	0.00160508	0.0371867
Dynlrb1	0.736939	7.47876	14.7436	0.00160474	0.0371867
Nabp1	1.04926	7.0988	14.7411	0.00160584	0.0371867
Acad11	-11.7541	3.18851	15.7142	0.00161464	0.0372887
Rexo2	-1.33717	6.50192	14.7174	0.001616	0.0372887
Dlgap5	2.95898	5.58171	14.6983	0.00162424	0.0374124
Socs2	-7.76747	2.77369	14.6667	0.00163798	0.0375288
Srpk1	-0.903815	7.57758	14.6752	0.00163428	0.0375288
Virma	1.18204	7.22995	14.6731	0.0016352	0.0375288
Lmf2	1.54304	6.54658	14.5951	0.00166962	0.0381469
Myo1e	4.09431	6.3589	14.5924	0.00167084	0.0381469
Srgn	0.818626	9.71656	14.5365	0.00169602	0.0386539
Acat1	-1.72607	6.35373	14.5162	0.00170528	0.0386669
Rpl7a	-1.03492	8.56595	14.5232	0.00170208	0.0386669
Fbxw8	6.32587	3.37809	14.5157	0.00170554	0.0386669
Cd244a	3.57694	5.45907	14.4947	0.00171519	0.0388178
Lilr4b	2.17418	8.40022	14.4675	0.00172777	0.0390343
Calm3	1.09905	7.21586	14.4445	0.0017385	0.0392084
4930523C07Rik	-0.99858	6.98509	14.4379	0.00174158	0.0392098
Nsrp1	1.10252	6.64687	14.4236	0.00174831	0.039293
Thnsl1	-10.6287	2.52934	15.3563	0.00175922	0.0394699
Rpl41	-1.20004	8.70529	14.3885	0.00176491	0.0395292
Sox13	-10.4521	1.04808	16.7291	0.00178446	0.039761
Rars	-1.10731	6.98599	14.3503	0.00178318	0.039761
Sfn	1.53383	5.19393	14.3597	0.00177869	0.039761
Gm4951	-12.5568	3.73299	15.194	0.00182971	0.0405473
Igf1r	-8.51728	2.34577	15.184	0.00183415	0.0405473
Stat5a	-1.63235	6.36602	14.2437	0.00183539	0.0405473
Tsc22d4	0.768341	7.58739	14.2674	0.00182361	0.0405473
Syngr3	10.5222	3.41671	15.1827	0.00183473	0.0405473
Gtpbp4	-0.814772	7.04021	14.231	0.00184168	0.0405483
2310001H17Rik	1.51988	5.32246	14.2373	0.00183856	0.0405483
Otulinl	-1.84553	4.89718	14.2115	0.00185149	0.0406951
Wrn	1.19413	6.61909	14.1835	0.0018656	0.0409359
St6gal1	-7.24516	5.25848	14.1724	0.00187126	0.0409908
Cd2	0.747772	10.1343	14.1348	0.00189048	0.0411444
Idh3a	1.0849	7.87704	14.1339	0.00189097	0.0411444
Scrib	2.5093	4.85476	14.1484	0.00188351	0.0411444
Ifitm2	8.3175	4.12331	15.0589	0.00189088	0.0411444
Ncoa7	-2.39279	5.4181	14.0936	0.00191183	0.0415287
Nt5c	-0.896182	6.6387	14.0502	0.0019346	0.0419529
Irf1	0.750202	9.19299	14.0172	0.00195212	0.0422623
Ermn	8.29508	3.11407	13.9939	0.00196461	0.0424618
Cyfip1	2.5657	6.04332	13.9791	0.00197258	0.0425485
Pbx3	6.24216	2.41673	13.9743	0.00197519	0.0425485
Dusp6	1.21175	7.2217	13.9399	0.00199391	0.0428807
Rapgef1	1.18083	6.67769	13.8666	0.00203441	0.0436071
Spn	1.30968	8.55454	13.8706	0.00203219	0.0436071
Acvrl1	-11.5502	2.38655	14.7486	0.00204062	0.0436679
Nedd9	0.896713	8.33836	13.847	0.00204543	0.0436988
Ahr	7.31609	2.23694	13.8307	0.00205464	0.0438233
Ccng1	0.886214	7.95304	13.8225	0.00205928	0.0438501
Nrp1	7.03839	4.28156	13.7706	0.00208896	0.0442392
Ssh2	-1.39699	8.10199	13.7667	0.0020912	0.0442392
Cyb5r3	0.985262	7.42382	13.7835	0.00208153	0.0442392
Fgr	2.83383	6.11675	13.7749	0.00208649	0.0442392
Nfe2l2	-1.45741	6.52094	13.7371	0.00210841	0.0445026
Crat	7.60563	3.28511	13.7335	0.00211051	0.0445026
Mrps18b	-1.75837	4.80496	13.7128	0.0021226	0.0446848
Gnptab	2.24958	6.45758	13.6907	0.00213563	0.0448864
Impdh2	-1.1928	6.75229	13.6817	0.00214096	0.0449255
Exoc2	0.926858	7.70309	13.6401	0.0021658	0.0453733
2410002F23Rik	-1.44062	5.75617	13.6299	0.00217195	0.0454288
Mrpl30	-1.28744	6.60419	13.5859	0.00219867	0.0459137
Rps13	-0.935387	8.51118	13.573	0.00220652	0.0460034
Pisd	-1.281	5.94436	13.5623	0.00221313	0.0460673
Pkm	0.751091	10.2353	13.5489	0.00222138	0.0461433
Sec14l1	2.06707	6.01564	13.5448	0.0022239	0.0461433
Pak1	-10.79	2.93163	15.6095	0.00226371	0.0468187
Rps29	-1.25783	7.6519	13.4756	0.00226728	0.0468187
Ppp1r12a	0.796438	8.87347	13.4777	0.00226594	0.0468187
Cdk4	-0.792379	7.75604	13.43	0.00229635	0.0473435
Epsti1	-0.892343	8.60721	13.4029	0.0023138	0.047552
Uhrf1	2.1764	6.15344	13.4036	0.00231337	0.047552
Nolc1	-0.930219	7.30465	13.3964	0.00231803	0.0475635
Nrros	-1.03259	7.31353	13.3771	0.00233059	0.0476704
Ccdc186	2.17229	5.30677	13.3779	0.00233011	0.0476704
Epas1	8.95057	3.35326	13.3406	0.0023546	0.0480858
Lnpep	1.34261	6.67309	13.323	0.00236623	0.0482473
Tspan31	-1.77837	6.2275	13.3109	0.0023743	0.0483357
Ndrg1	-11.2714	3.07918	14.1068	0.00239607	0.0485486
Dmbt1	-9.90367	0.55563	15.3423	0.00239973	0.0485486
Hcfc1	1.3635	6.93244	13.2736	0.00239934	0.0485486
Ccr2	2.29421	7.46038	13.2755	0.00239809	0.0485486
Inpp1	1.45993	6.95875	13.2633	0.0024063	0.0486058
Gpr34	-10.2708	3.55591	14.593	0.00243416	0.049092
Tg	3.7498	5.23113	13.2147	0.00243952	0.0491238
Gm11110	2.25227	4.12795	13.1661	0.00247318	0.0497244
Klrg1	3.24325	5.76161	13.1544	0.00248142	0.0498128

## Sheet: CD4_OT2 Vb5+ PD1+ vs. PD1-
genes	logFC	logCPM	F	PValue	FDR
Gm4956	-3.32059	6.28718	80.4815	7.57233e-08	0.000965396
Il21	10.1733	5.11165	70.701	1.8761e-07	0.00119592
Pdcd1	3.0958	9.62117	64.176	3.64576e-07	0.00154933
Dusp14	3.74828	5.41867	48.5054	2.31417e-06	0.00737584
Gbp4	-2.04708	9.54039	45.0721	3.68503e-06	0.00798013
Plxnb2	10.932	4.25132	44.936	3.75565e-06	0.00798013
Satb1	-3.97303	6.05416	42.2679	5.49748e-06	0.00876091
Igtp	-2.21501	9.19661	43.162	4.82914e-06	0.00876091
Bhlhe40	1.89978	8.16146	40.6308	7.00697e-06	0.00992576
Tgtp1	-2.97484	6.21674	39.3473	8.5177e-06	0.0107007
Tnfaip8	1.42333	8.17962	38.826	9.23269e-06	0.0107007
Gem	2.2838	6.37761	35.7928	1.49951e-05	0.015931
Gm12250	-1.67188	7.15613	34.6434	1.81571e-05	0.0162401
Cyb5a	-1.46431	8.03948	35.1863	1.65792e-05	0.0162401
Gpr35	11.5173	3.14332	51.109	1.91075e-05	0.0162401
Als2cl	-2.10946	6.94361	33.5669	2.18087e-05	0.0173774
Lat2	5.59684	6.09806	32.6934	2.5381e-05	0.0190343
Fcgr2b	11.6427	4.90326	31.4698	3.15389e-05	0.0223383
Pmaip1	1.58702	7.84299	30.8274	3.54296e-05	0.0225846
Evi2a	2.02883	6.69306	30.8718	3.5144e-05	0.0225846
Fras1	9.90909	3.09267	30.1851	3.98645e-05	0.0242016
Pkig	6.29091	5.03809	29.38	4.63268e-05	0.0268464
Zeb2	6.08963	5.23173	28.0969	5.9197e-05	0.0313094
Evl	-2.21091	6.75693	27.7105	6.38237e-05	0.0313094
Cd22	5.15626	7.30891	27.7083	6.38517e-05	0.0313094
H2-Eb1	6.07596	7.66928	27.8949	6.15678e-05	0.0313094
Usp3	-1.50668	6.95796	26.8696	7.53601e-05	0.031355
Utrn	-1.45025	9.45852	25.9021	9.16196e-05	0.031355
Ifi47	-1.36268	8.91564	25.9386	9.09389e-05	0.031355
Cd81	2.03404	8.32324	26.1878	8.64413e-05	0.031355
Cd44	2.43837	7.38693	26.9697	7.38725e-05	0.031355
Lgals3	2.56764	7.55849	25.3192	0.000103295	0.031355
Pou2f2	2.59425	5.56038	25.789	9.37638e-05	0.031355
Itgb1	3.0366	6.52879	26.6547	7.8671e-05	0.031355
Cd74	3.78721	10.9367	27.3657	6.82973e-05	0.031355
Serpinb1a	4.03881	6.45862	25.6595	9.62891e-05	0.031355
Cd79b	5.29866	7.29761	25.8881	9.18813e-05	0.031355
Napsa	5.9904	6.65972	26.0874	8.82226e-05	0.031355
1810034E14Rik	6.55076	3.33494	25.9159	9.13605e-05	0.031355
1810046K07Rik	8.75849	5.53214	25.4268	0.000101018	0.031355
Bcar3	10.7179	3.65789	27.3674	0.000102431	0.031355
Pstpip2	10.9123	4.00505	28.6058	8.20251e-05	0.031355
Nsg2	-3.00003	6.513	24.9515	0.000111513	0.0317785
Ccdc50	4.04505	5.28532	24.7635	0.000115996	0.0317785
Themis2	4.29842	6.38516	24.6164	0.000119646	0.0317785
Cybb	4.77485	7.26716	24.9523	0.000111495	0.0317785
H2-Ab1	5.56858	8.34064	24.6779	0.000118105	0.0317785
Klrk1	9.69206	4.46481	26.5479	0.000119098	0.0317785
Ndrg3	-1.60187	7.17542	24.5172	0.000122179	0.0317891
Plk2	4.52821	6.78193	24.2888	0.000128243	0.0326995
Iigp1	-2.1608	8.30836	23.8823	0.000139887	0.0330264
Ifi208	-1.98206	7.03063	24.03	0.000135526	0.0330264
9530068E07Rik	1.45995	6.64417	24.0985	0.000133555	0.0330264
Xdh	2.54928	6.82226	23.906	0.000139179	0.0330264
Ly6c1	-8.5092	4.93238	25.5438	0.000143883	0.033352
Igfbp4	-12.2545	3.49294	31.5747	0.000158082	0.0353577
Ifi209	-0.983196	8.46276	23.3452	0.000157133	0.0353577
Adam8	5.51242	5.58659	23.1484	0.000164038	0.0359967
Spp1	13.7372	5.89138	24.7831	0.000166586	0.0359967
Crtam	4.03491	4.47913	22.8038	0.000176966	0.0370981
Angptl2	10.301	5.28506	22.7901	0.000177503	0.0370981
Fosb	3.57228	4.94042	22.5104	0.000188875	0.0388381
Camk4	-1.73382	7.15817	22.3112	0.000197471	0.0399613
Atn1	-1.92829	5.52973	22.017	0.000210985	0.0420289
Tgtp2	-1.77903	7.15921	21.5303	0.000235672	0.0425497
Irgm1	-1.4914	6.97255	21.6962	0.00022691	0.0425497
BC064078	2.40883	5.33911	21.6918	0.000227137	0.0425497
Plek	3.04671	7.99304	21.5064	0.000236962	0.0425497
Aldh2	4.82905	5.22206	21.5388	0.000235212	0.0425497
Wdfy4	10.6522	4.47463	21.8636	0.000218438	0.0425497
Fgd6	11.4232	3.05174	25.3088	0.000232436	0.0425497
Ahr	7.13555	4.38258	21.3778	0.00024406	0.0432155
Btk	11.4143	4.24992	22.7147	0.000251964	0.044004
Ccr7	-3.36191	7.29571	20.9119	0.000271833	0.0440055
Zfp955a	-3.3094	4.09434	20.8253	0.000277383	0.0440055
Gm4951	-2.49291	5.45332	20.3051	0.000313474	0.0440055
Gbp8	-2.03405	7.65854	20.4184	0.000305188	0.0440055
Gbp6	-1.80689	7.45801	20.6288	0.000290435	0.0440055
Rnf167	-1.1108	8.30689	20.8224	0.000277566	0.0440055
Kmt2d	-1.04597	8.4444	20.2967	0.000314103	0.0440055
Ctsb	0.960942	10.3074	20.6784	0.000287078	0.0440055
Aplp2	1.0563	7.28984	21.1649	0.000256334	0.0440055
Tnfaip3	1.76065	8.26072	20.5657	0.000294774	0.0440055
Cyfip1	2.79712	7.78674	20.6205	0.000291002	0.0440055
Fut8	2.84115	5.24557	20.438	0.000303777	0.0440055
Plac8	4.67077	6.88723	20.9447	0.000269767	0.0440055
Tnfrsf13c	5.35008	6.67267	20.6759	0.000287247	0.0440055
Ly86	5.82818	5.14914	20.7213	0.000284206	0.0440055
5830411N06Rik	7.90336	4.80474	20.708	0.000285093	0.0440055
Ica1l	10.4119	2.53319	23.6898	0.000310464	0.0440055
Shtn1	11.9487	3.63197	21.8221	0.000303479	0.0440055
Dusp6	1.77182	7.34214	20.126	0.000327098	0.0444681
Ciita	7.87294	4.74946	20.1161	0.000327869	0.0444681
Tctex1d2	9.38631	2.65472	21.5331	0.000322645	0.0444681
Tet3	-2.15566	5.47836	19.9845	0.000338329	0.0451289
Fcrla	10.9249	4.16573	21.2903	0.000339821	0.0451289
Arhgef1	-1.10692	7.23843	19.9079	0.000344594	0.045291
Mef2c	12.7692	5.72453	19.7716	0.000356056	0.04632
Kbtbd11	-2.1034	6.63239	19.6554	0.000366168	0.0471543
Nfatc1	0.998902	8.2405	19.4812	0.000381937	0.0483888
Arhgap15	-1.30642	8.69547	19.466	0.000383345	0.0483888
Rev3l	-2.05009	6.14754	19.2728	0.000401813	0.0492568
Nap1l1	1.38393	6.62035	19.2729	0.000401801	0.0492568
Rassf4	13.2964	4.57411	20.5222	0.000401397	0.0492568
Arl5a	-1.68624	5.73627	19.032	0.000426229	0.0497575
Rapgef6	-1.11399	8.92089	18.9659	0.000433217	0.0497575
Nedd4	3.3624	5.36149	18.9913	0.000430524	0.0497575
Lgmn	3.73825	7.7498	19.0122	0.000428307	0.0497575
Csf2ra	7.57734	1.95944	19.0533	0.000424007	0.0497575
Cd19	8.73796	6.68063	19.0295	0.000426491	0.0497575
Eps8	12.4046	3.56665	20.2179	0.00042922	0.0497575
Agpat2	9.41032	2.00036	20.1248	0.000438167	0.0498767

## Sheet: CD8_WT PD1+ vs. OT1 Vb5+ PD1+
	no differentially expressed genes

## Sheet: CD4_WT PD1+ vs. OT2 Vb5+ PD1+
	no differentially expressed genes
